# Supplementary material
Source: publisher figshare collection journal article supplement (https://acs.figshare.com/ndownloader/files/4164286)
Supplement: Supplementary file 1 [file 4164286]

## Supporting Information

# Indium Tri(isopropoxide)-Catalyzed Selective Meerwein-Ponndorf-Verley Reduction of Aliphatic and Aromatic Aldehydes

Jaeyoung Lee, Taekyu Ryu, Sangjune Park, and Phil Ho Lee\*

Department of Chemistry,  
Kangwon National University, Chuncheon 200-701, Republic of Korea  
phlee@kangwon.ac.kr

## Table of Contents

|                                                                   |          |
|-------------------------------------------------------------------|----------|
| 1. General .....                                                  | S2       |
| 2. $^1\text{H}$ and $^{13}\text{C}$ NMR spectra of products ..... | S3 - S56 |

## Experimental Section

**General:** Reactions were carried out in oven-dried glassware under nitrogen atmosphere. All commercial reagents were used without purification, and all solvents were reaction grade. 2-Propanol was freshly distilled from calcium hydride. All reaction mixtures were stirred magnetically and were monitored by thin-layer chromatography using silica gel precoated glass plates, which were visualized with UV light and then developed using a solution of anisaldehyde. Flash column chromatography was carried out using silica gel (230-400 mesh).  $^1\text{H}$  NMR and  $^{13}\text{C}$  NMR spectra were recorded on a 400 MHz NMR spectrometer. Deuterated chloroform was used as the NMR solvent. The chemical shift values ( $\delta$ ) are reported in parts per million relative to the residual signals of these solvents ( $\text{CDCl}_3$ :  $\delta$  7.24 for  $^1\text{H}$  and  $\delta$  77.0 for  $^{13}\text{C}$ ). Infrared spectra were recorded on a FT-IR spectrometer using two sodium chloride plates.



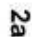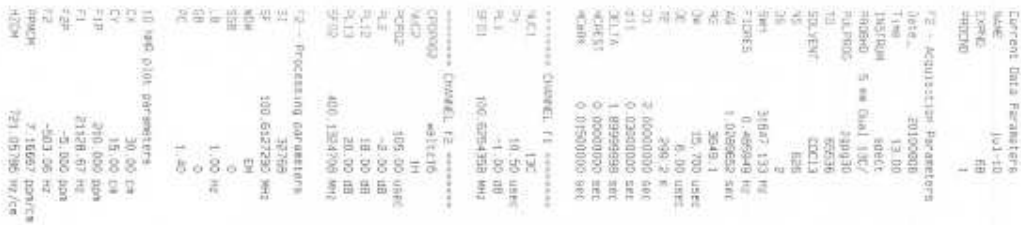

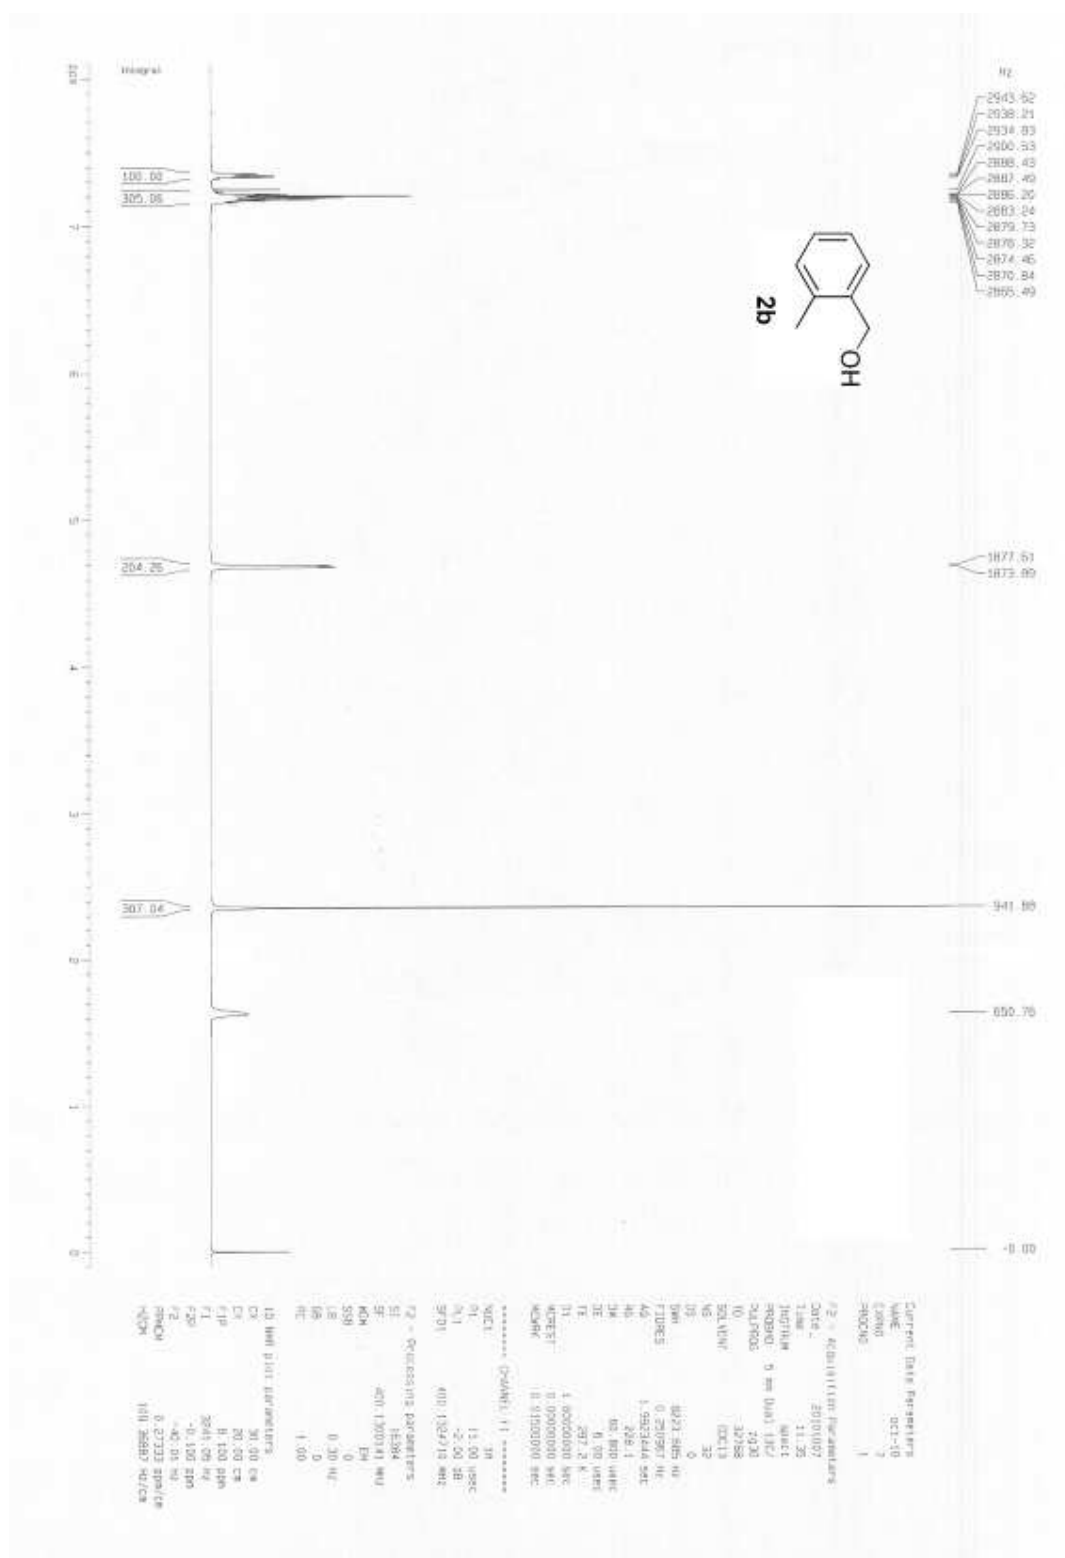

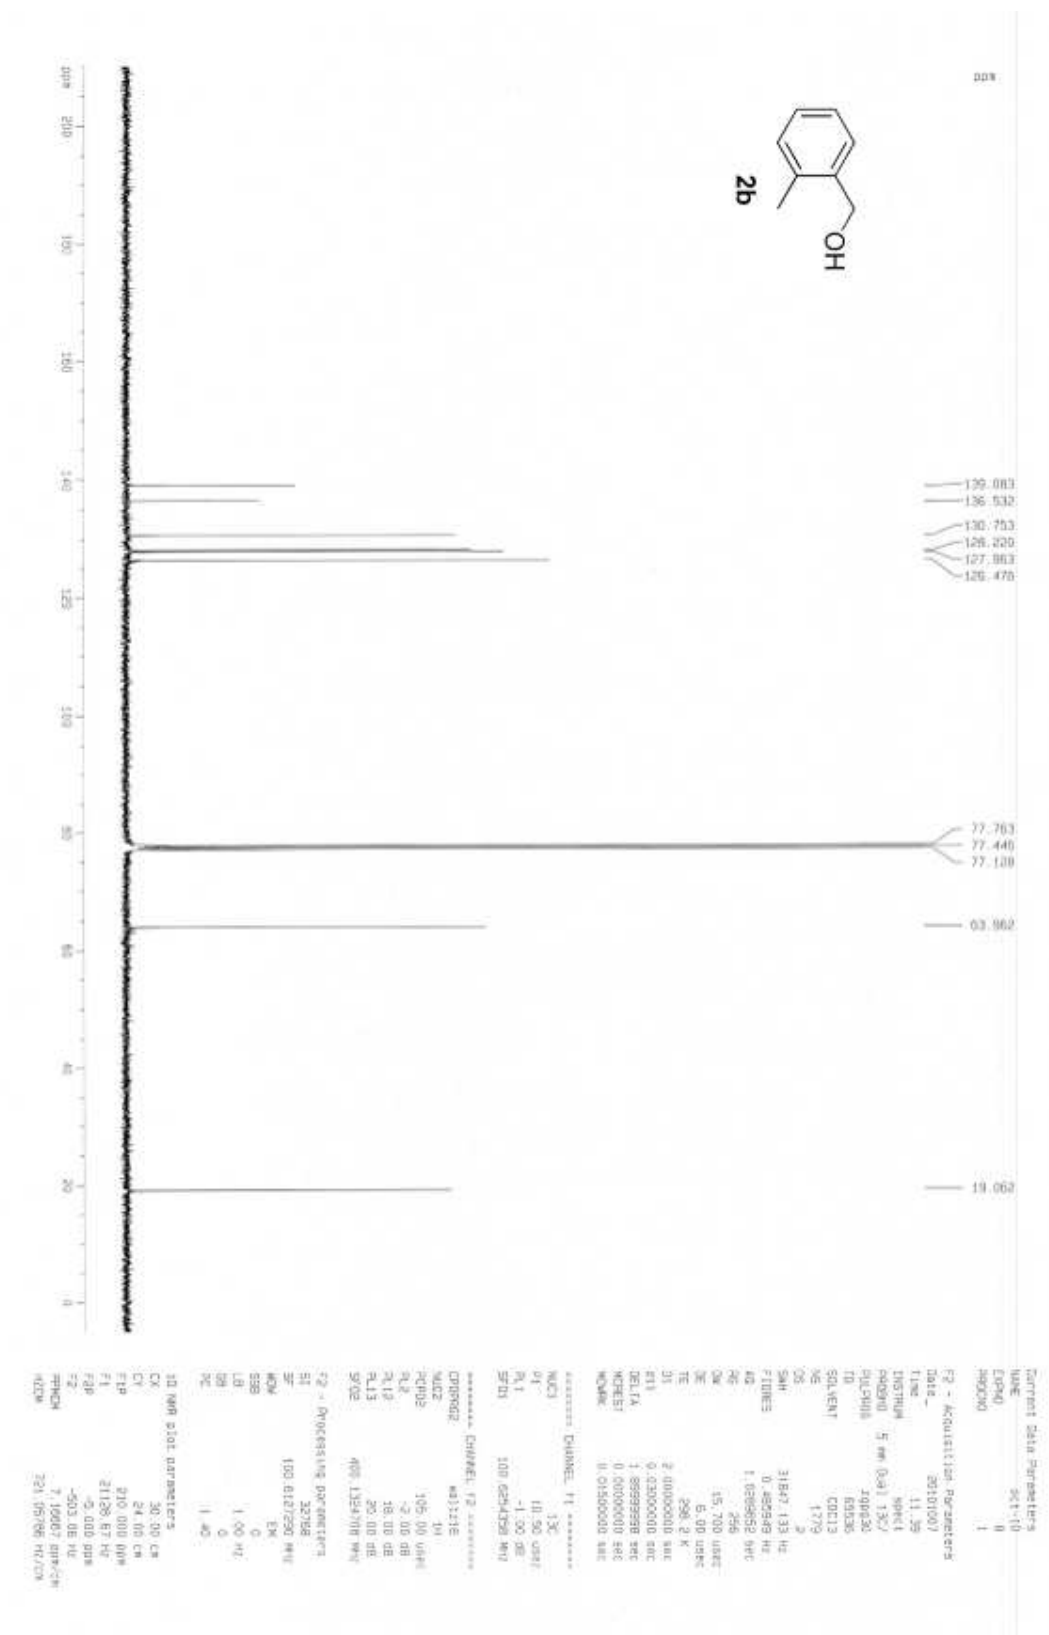

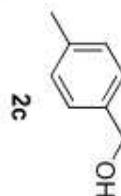0.27333 1000/1000  
100.36287 842/1000

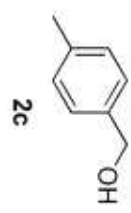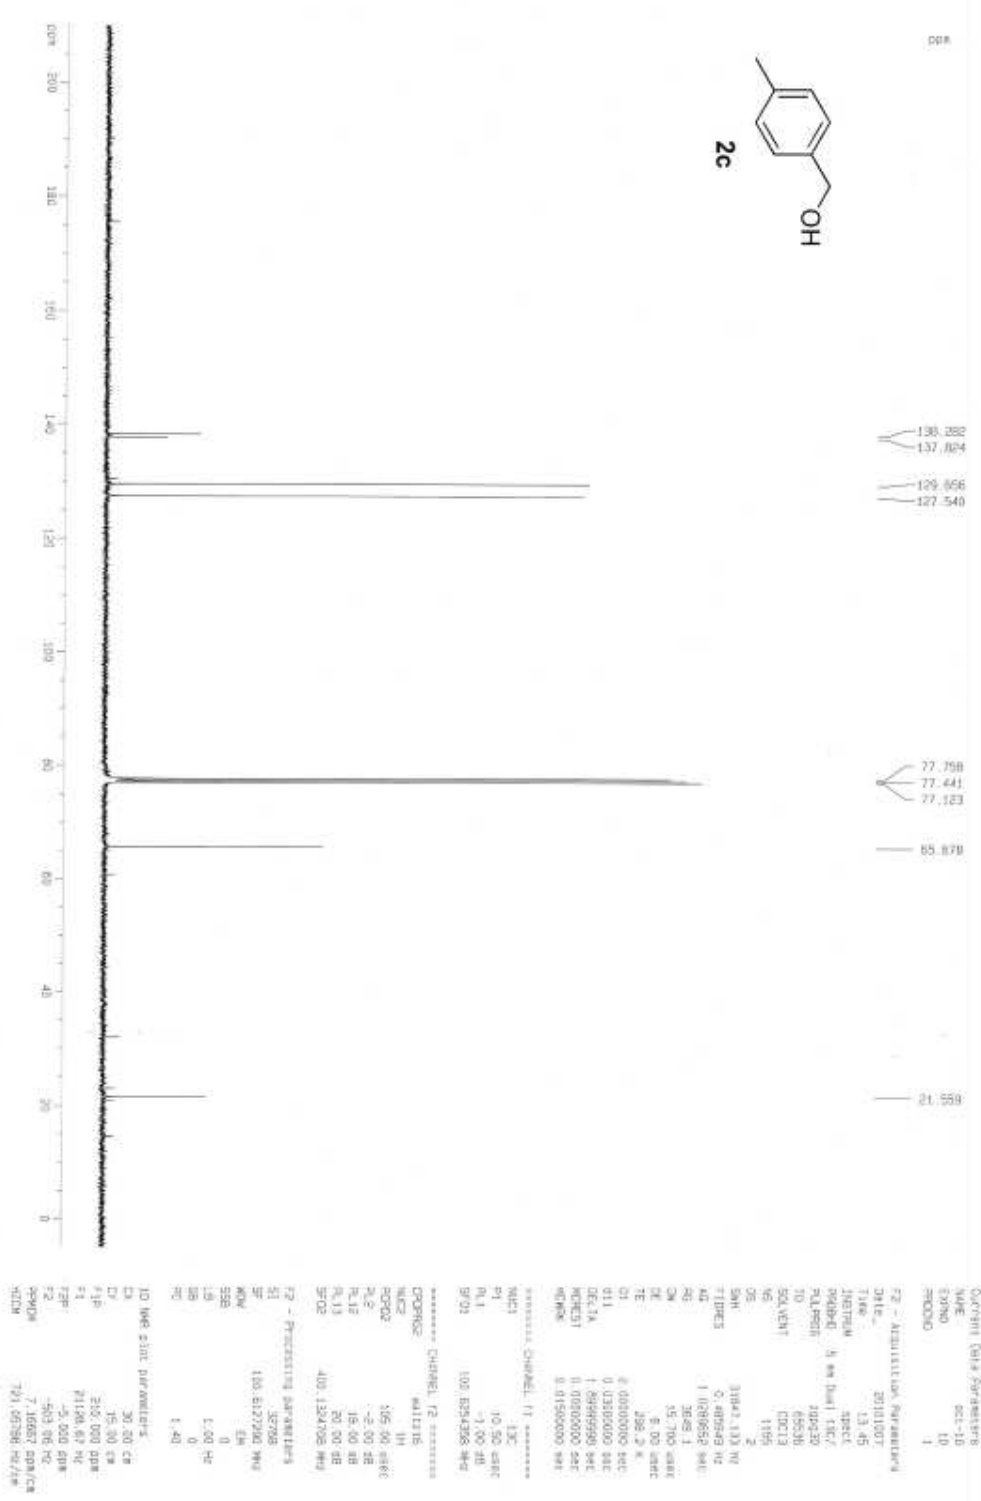





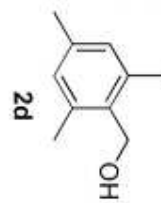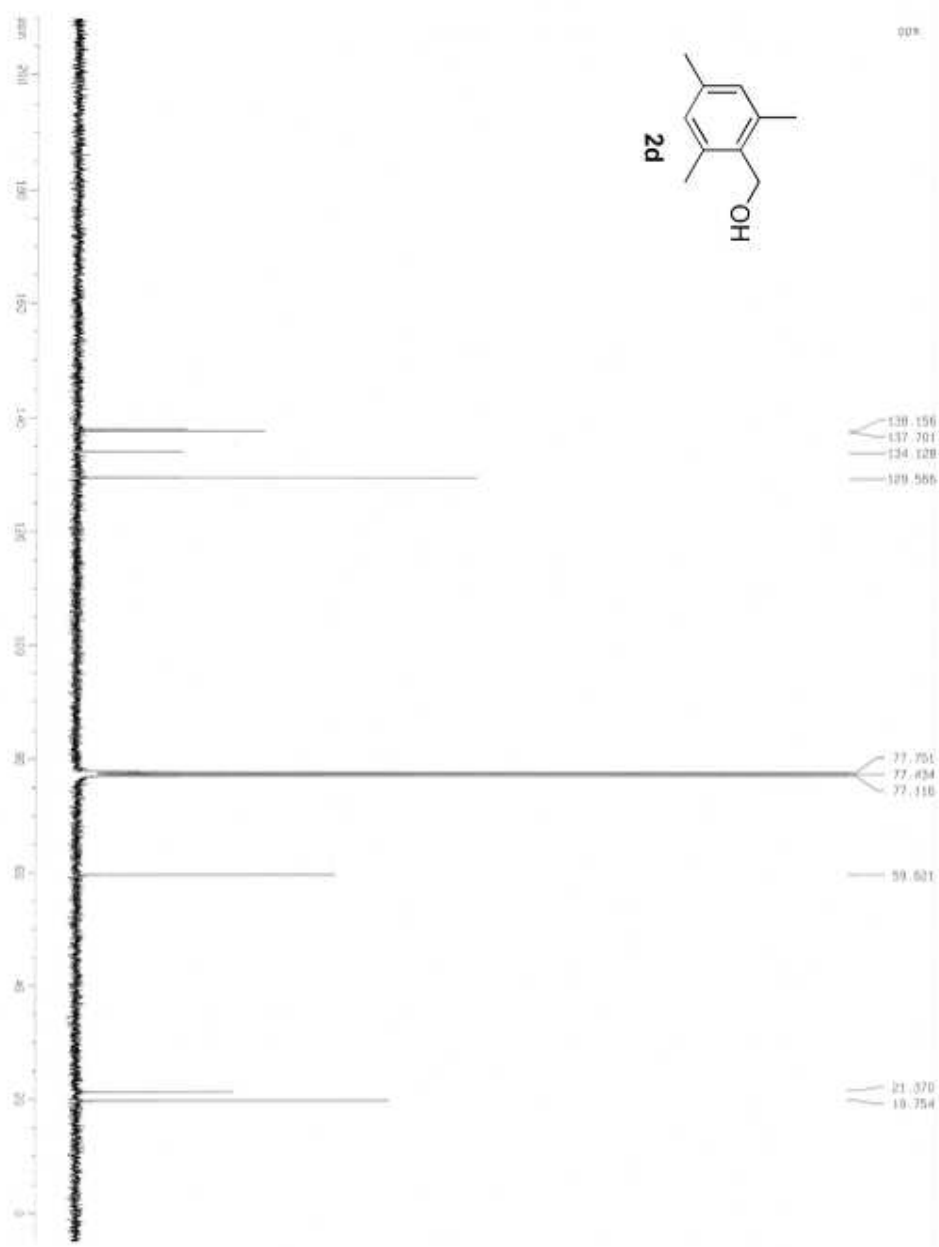

Current Data Parameters  
Date: 20101012  
Time: 9:54  
INSTRUM: spect  
PROCNO: 5  
SOLVENT: CDCl<sub>3</sub>  
PULPROG: zgpg30  
TD: 65536  
SOLVENT: CDCl<sub>3</sub>  
NS: 1203  
DS: 2  
SWH: 31827.133 Hz  
FIDRES: 0.465940 Hz  
AQ: 1.1028902 sec  
RG: 3849.1  
GB: 13.700 Hz  
PC: 6.00 usec  
TE: 297.2 K  
DE: 2.00000000 Hz  
J1: 0.03000000 Hz  
J11: 1.8995958 Hz  
J12: 0.00000000 Hz  
J13: 0.01900000 Hz

===== CHANNEL f1 =====  
NUC1: 13C  
P1: 10.00 usec  
PL1: -1.00 dB  
SFO1: 100.625426 MHz  
  
===== CHANNEL f2 =====  
CPDPRG2: waltz16  
NUC2: 1H  
P2: 105.00 usec  
PL2: -2.00 dB  
P3: 18.00 usec  
PL3: 20.00 dB  
SFO2: 400.146405 MHz  
  
F2 - Processing parameters  
SI: 32768  
SF: 100.617262 MHz  
WDW: EM  
SSB: 0  
LB: 1.00 Hz  
GB: 0  
PC: 1.45

1D NMR D101 Parameters  
CX: 3D OF: 0 Hz  
CY: 38.00 Hz  
F1P: 210.000 MHz  
F1: 210.00 MHz  
F2P: -5.000 MHz  
F2: -50.00 Hz  
FREQ0: 7.18627 MHz  
-DCH: 701.00765 MHz



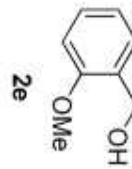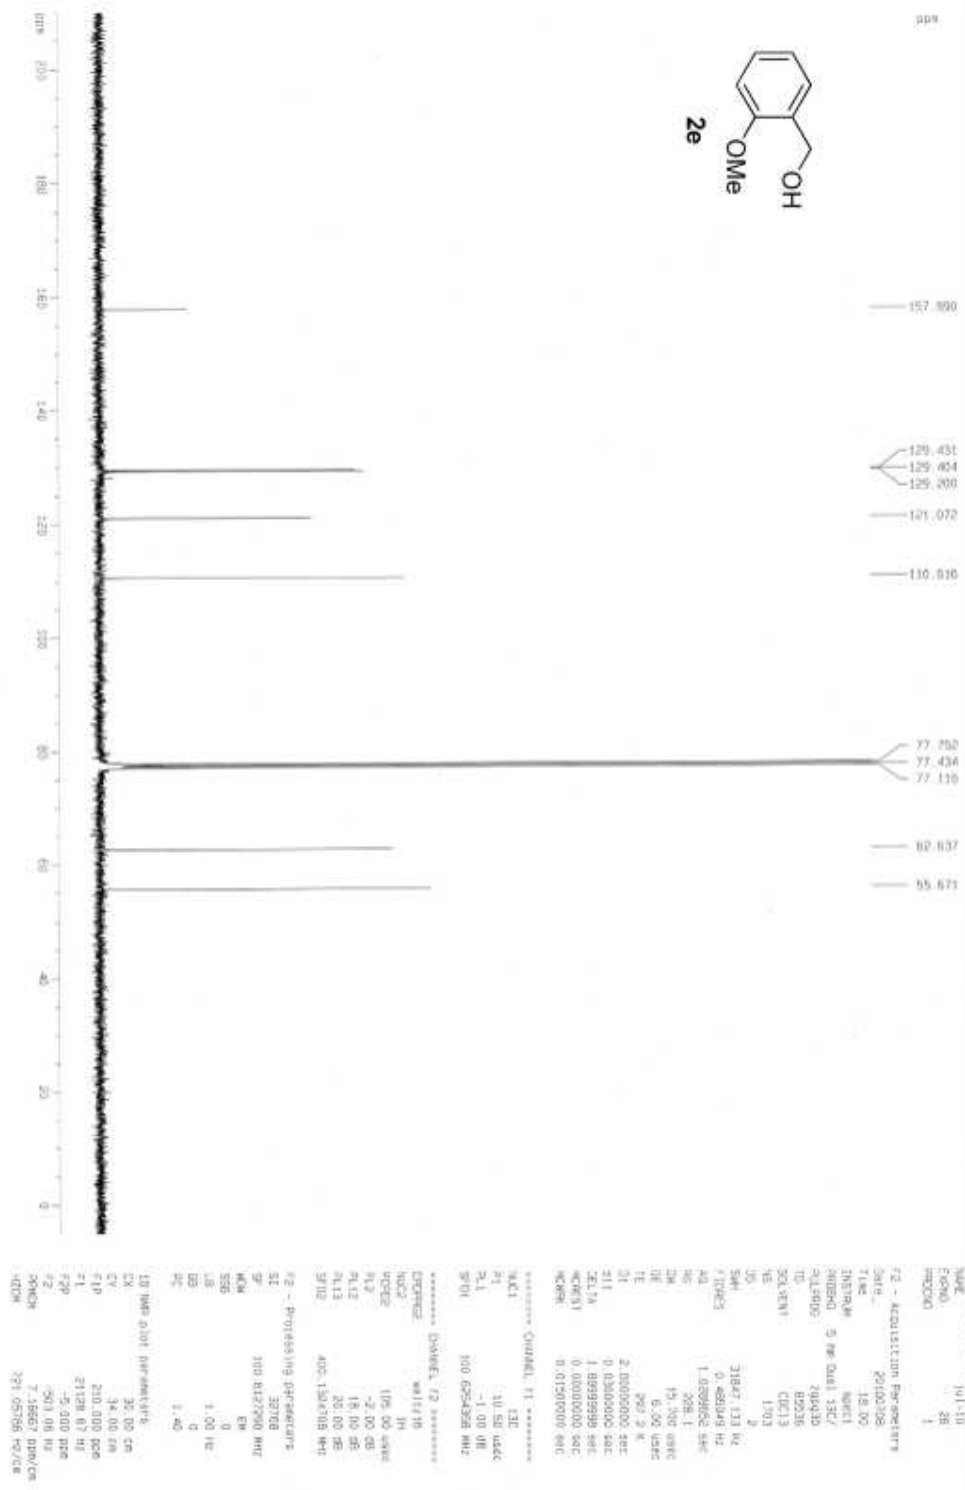



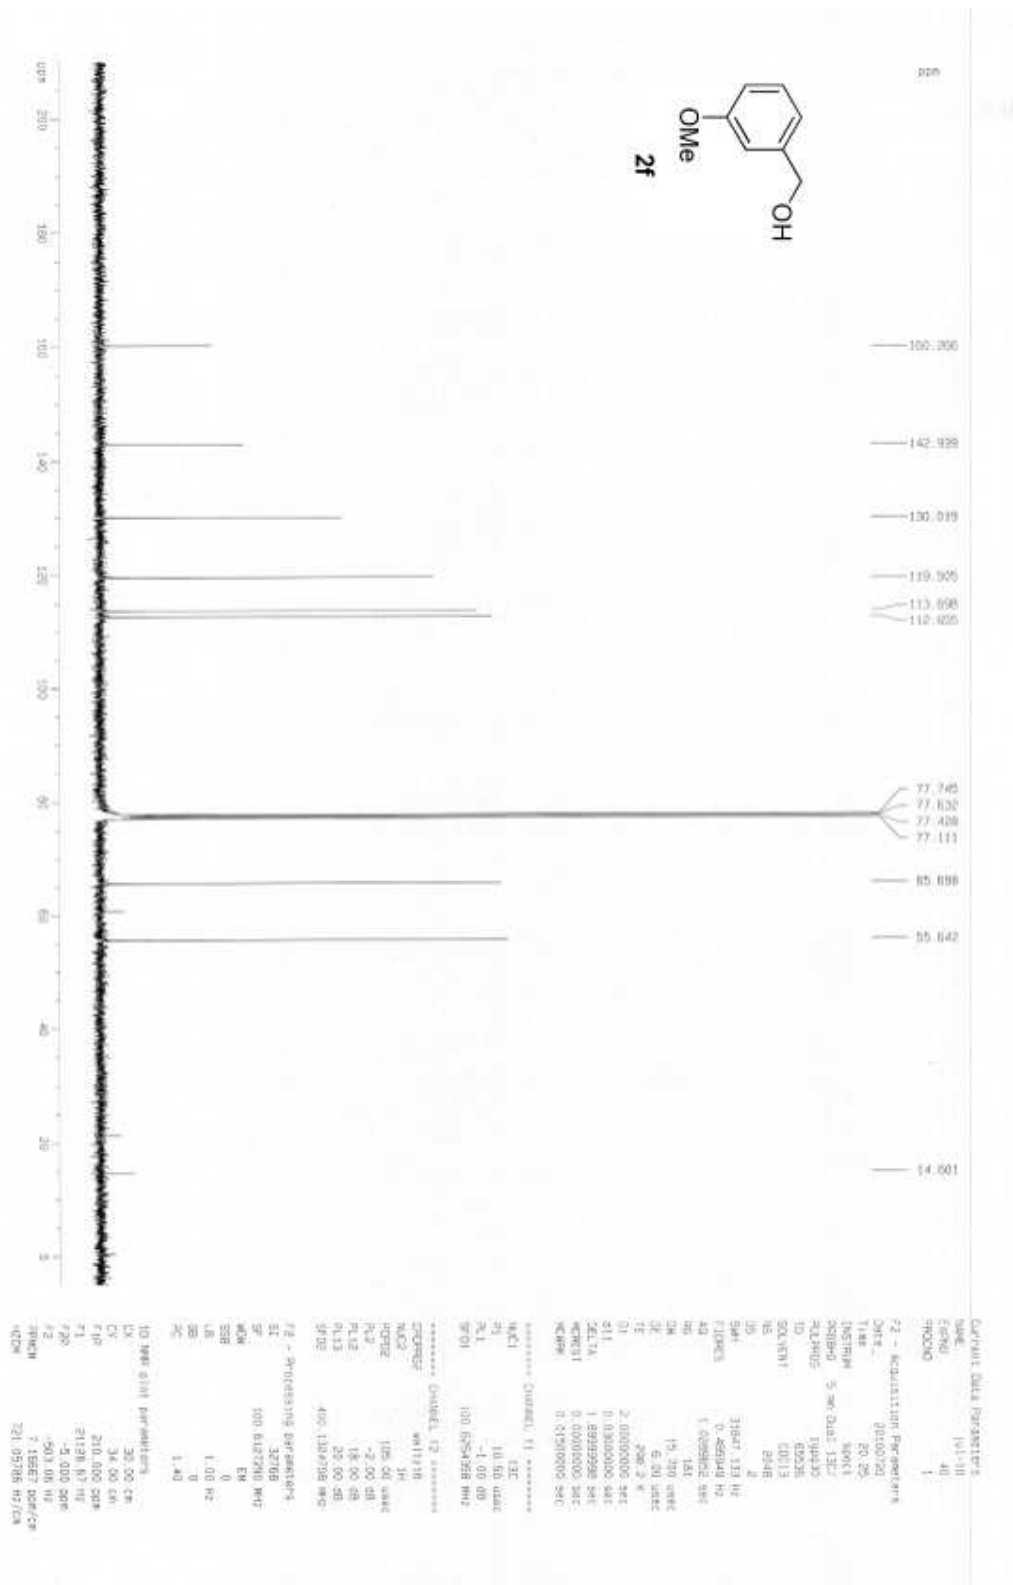



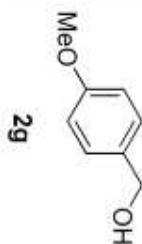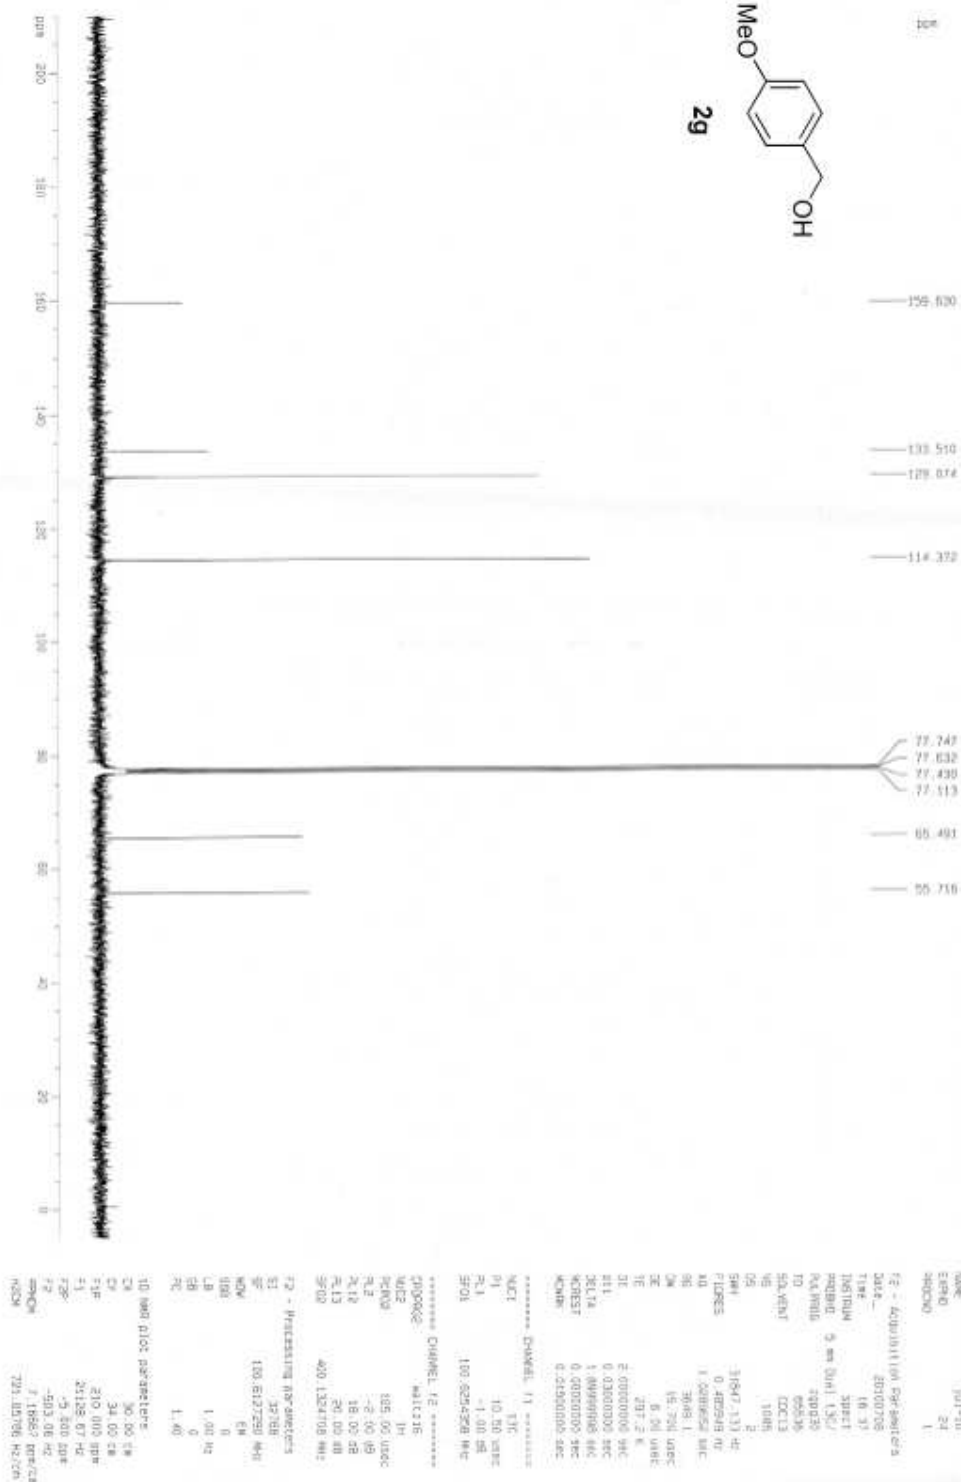





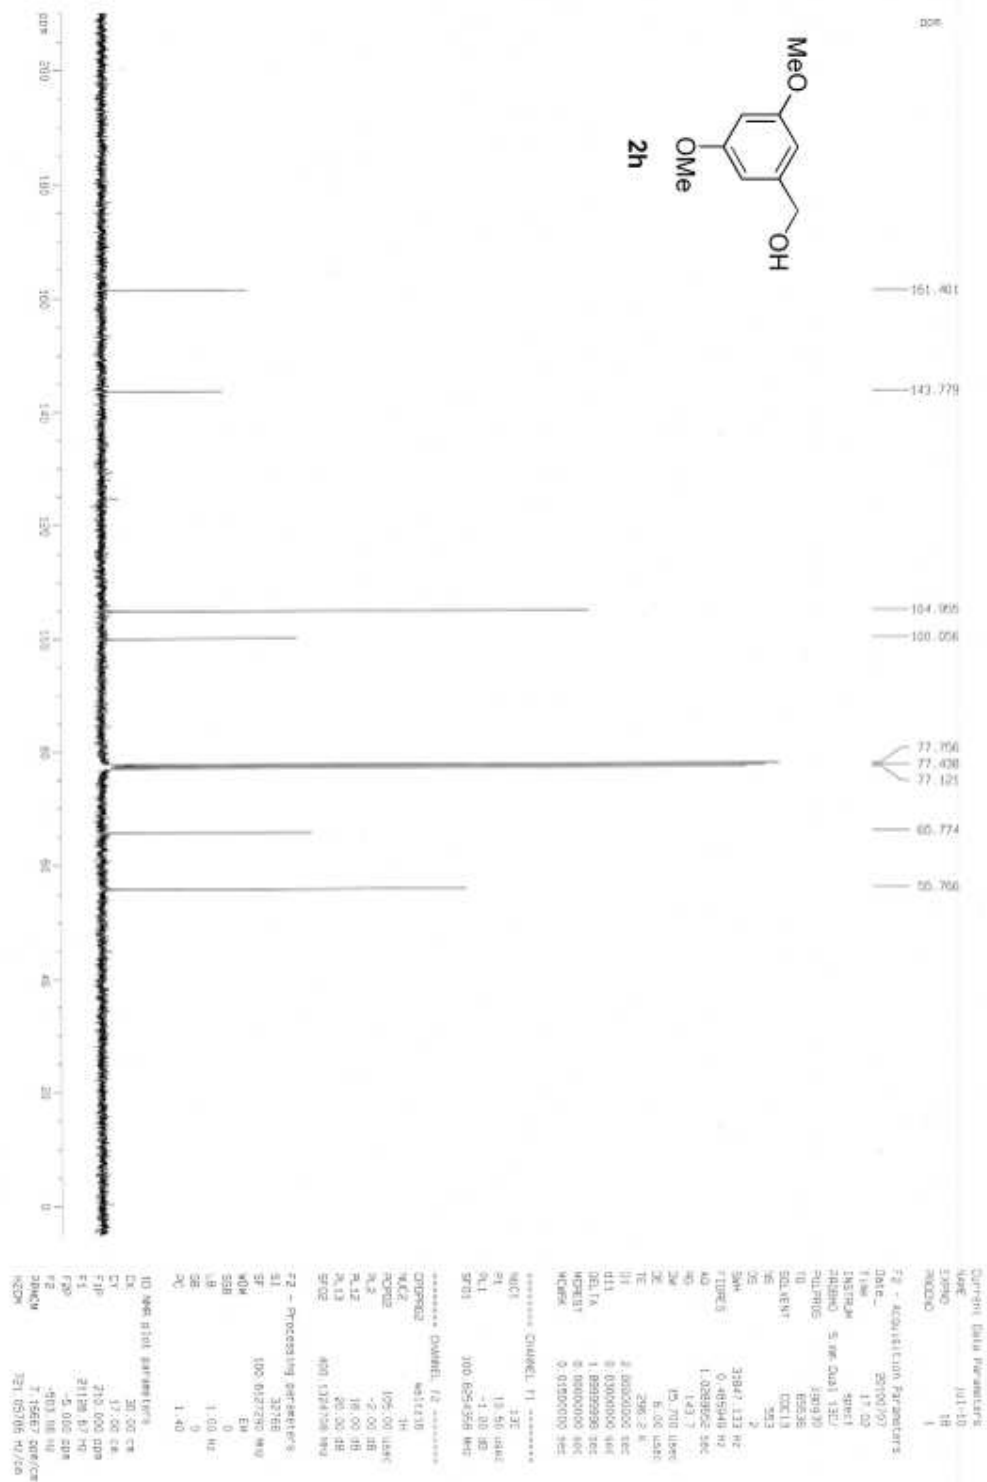

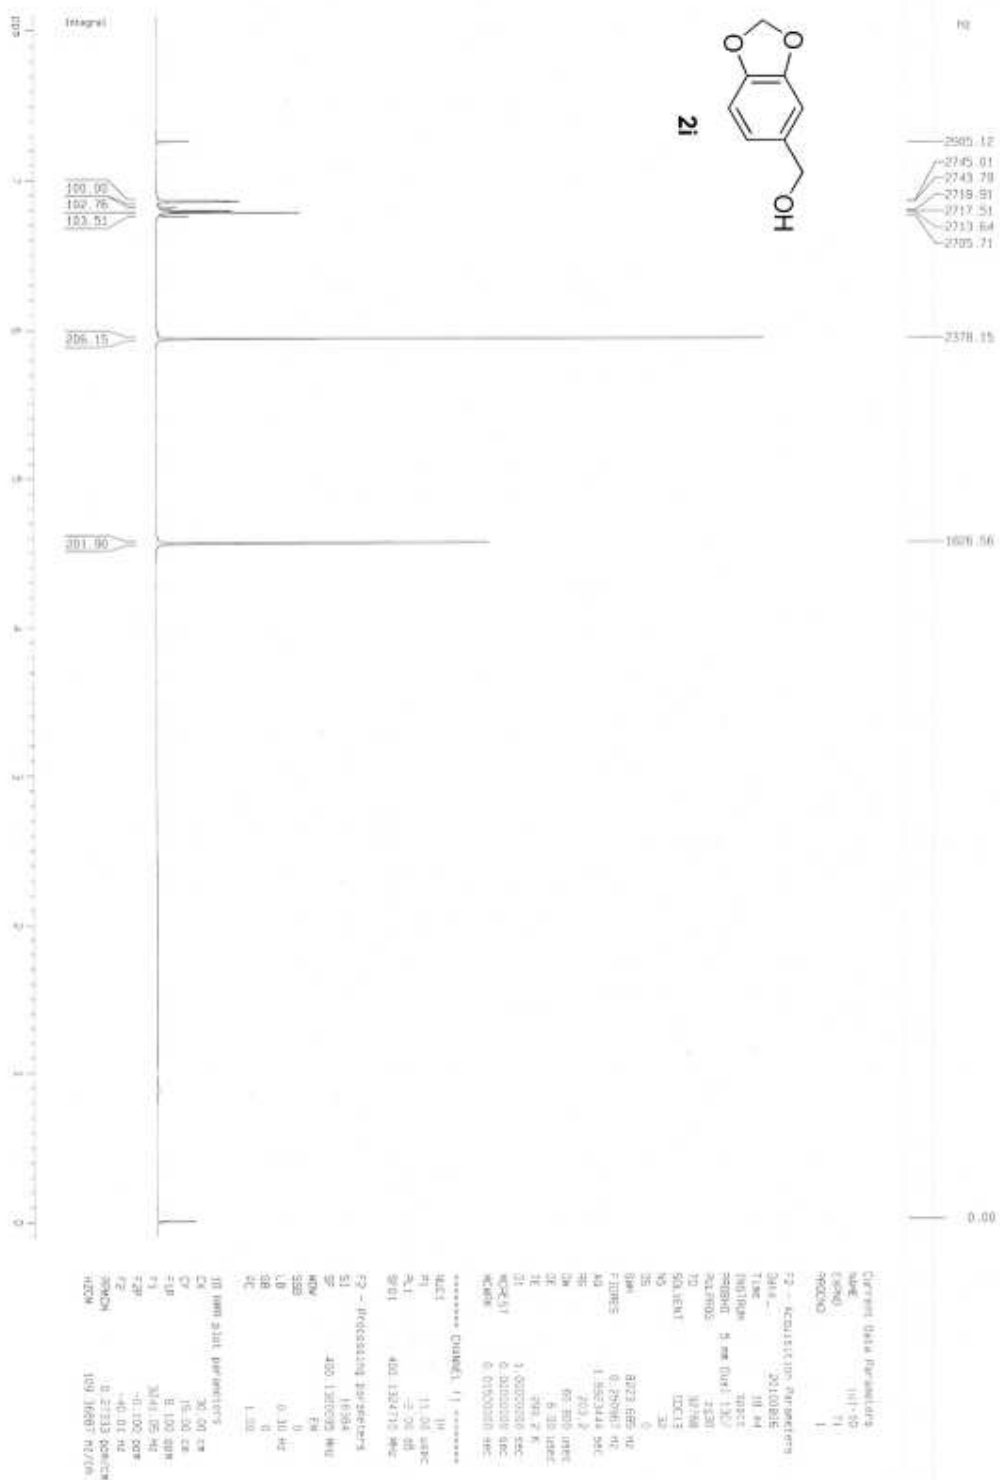

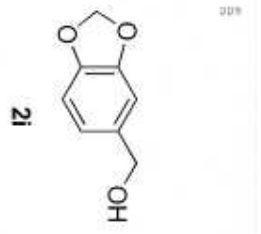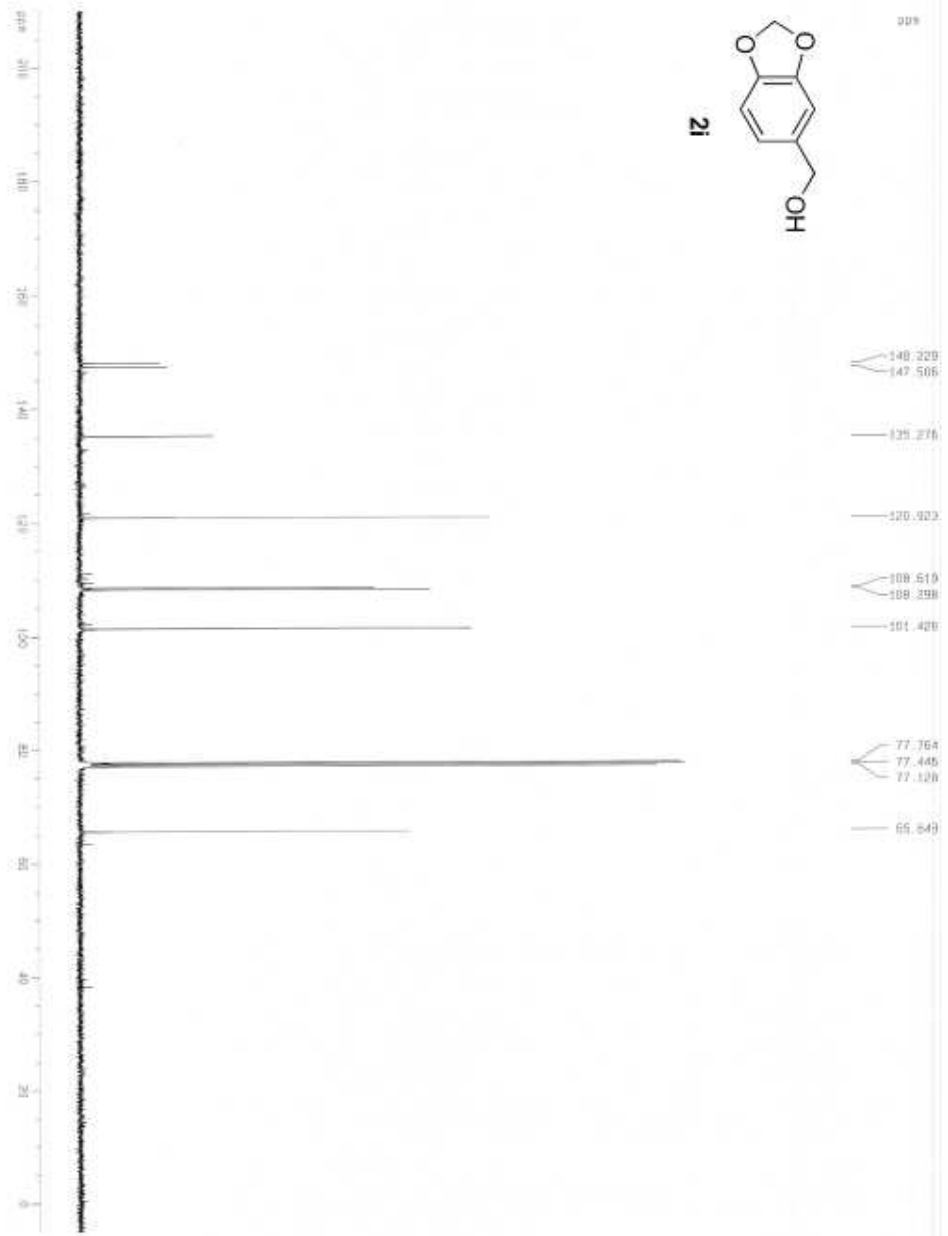

Current Data Parameters

| NAME    | EXPNO         | F2 - Acquisition Parameters |
|---------|---------------|-----------------------------|
| 141-10  | 1             | 20100805                    |
| EXPNO   | 1             | 19.35                       |
| PROCNO  | 1             | 19.35                       |
| PROBHD  | 5 mm QNP 1H/1 | 100.630                     |
| PULPROG | zgpg30        | 100.630                     |
| TD      | 65536         | 100.630                     |
| RG      | 327.68        | 100.630                     |
| SD      | 2             | 100.630                     |
| SH      | 31947.133 Hz  | 100.630                     |
| F1FRES  | 0.400000 Hz   | 100.630                     |
| RG      | 1.000000 sec  | 100.630                     |
| RG      | 3045.1        | 100.630                     |
| RG      | 15.700 sec    | 100.630                     |
| RG      | 0.00 sec      | 100.630                     |
| RG      | 296.2 K       | 100.630                     |
| RG      | 2.0000000 Hz  | 100.630                     |
| RG      | 0.0000000 sec | 100.630                     |
| RG      | 1.8999998 sec | 100.630                     |
| RG      | 0.0000000 sec | 100.630                     |
| RG      | 0.0150000 sec | 100.630                     |

===== CHANNEL f1 =====

| NUC1 | 1H             |
|------|----------------|
| Q1   | 10.50 UPPC     |
| P1   | -1.00 dB       |
| PR1  | 100.630000 MHz |

===== CHANNEL f2 =====

| CPDPRG2 | zgpg30        |
|---------|---------------|
| RG      | 100.00 sec    |
| RG      | -2.00 dB      |
| RG      | 18.00 dB      |
| RG      | 35.00 dB      |
| RG      | 400.132708 Hz |

F2 - Processing parameters

| SI                         | 32768          |
|----------------------------|----------------|
| SI <td>100.632708 MHz</td> | 100.632708 MHz |
| SI <td>0</td>              | 0              |
| SI <td>0</td>              | 0              |
| SI <td>1.00 Hz</td>        | 1.00 Hz        |
| SI <td>0</td>              | 0              |
| SI <td>1.40</td>           | 1.40           |

10 MHz D101 parameters

| CA | 20.00 Hz     |
|----|--------------|
| CV | 20.00 Hz     |
| CP | 210.000 Hz   |
| F1 | 211.08.67 Hz |
| F2 | -2.000 Hz    |
| F3 | -50.00 Hz    |
| PC | 7.1000 Hz    |
| PC | 201.0000 Hz  |

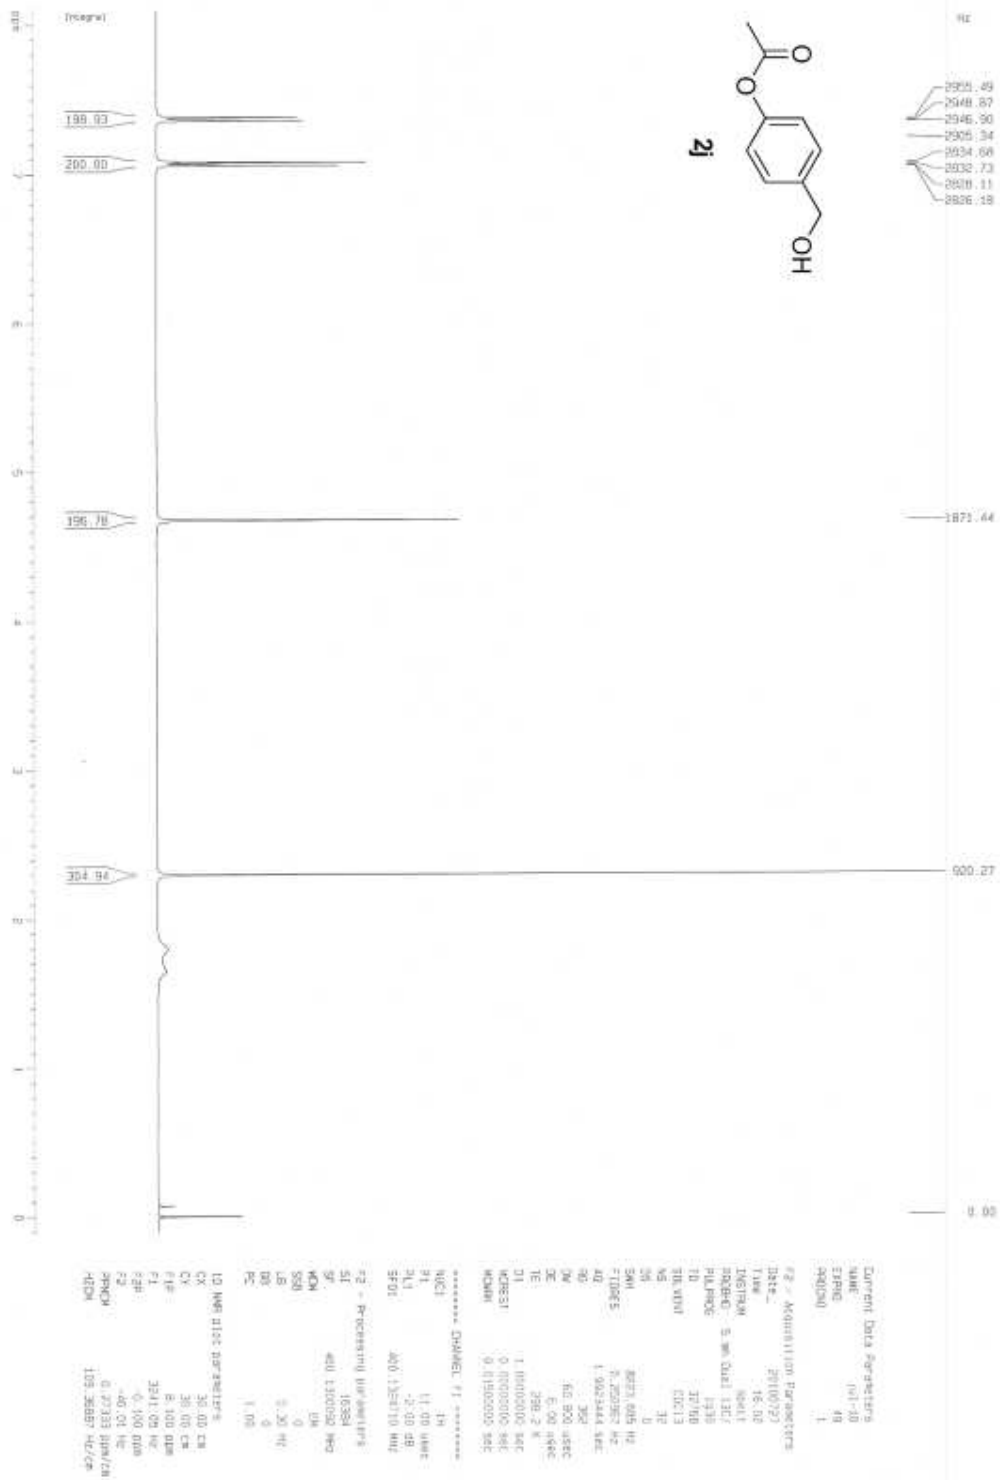

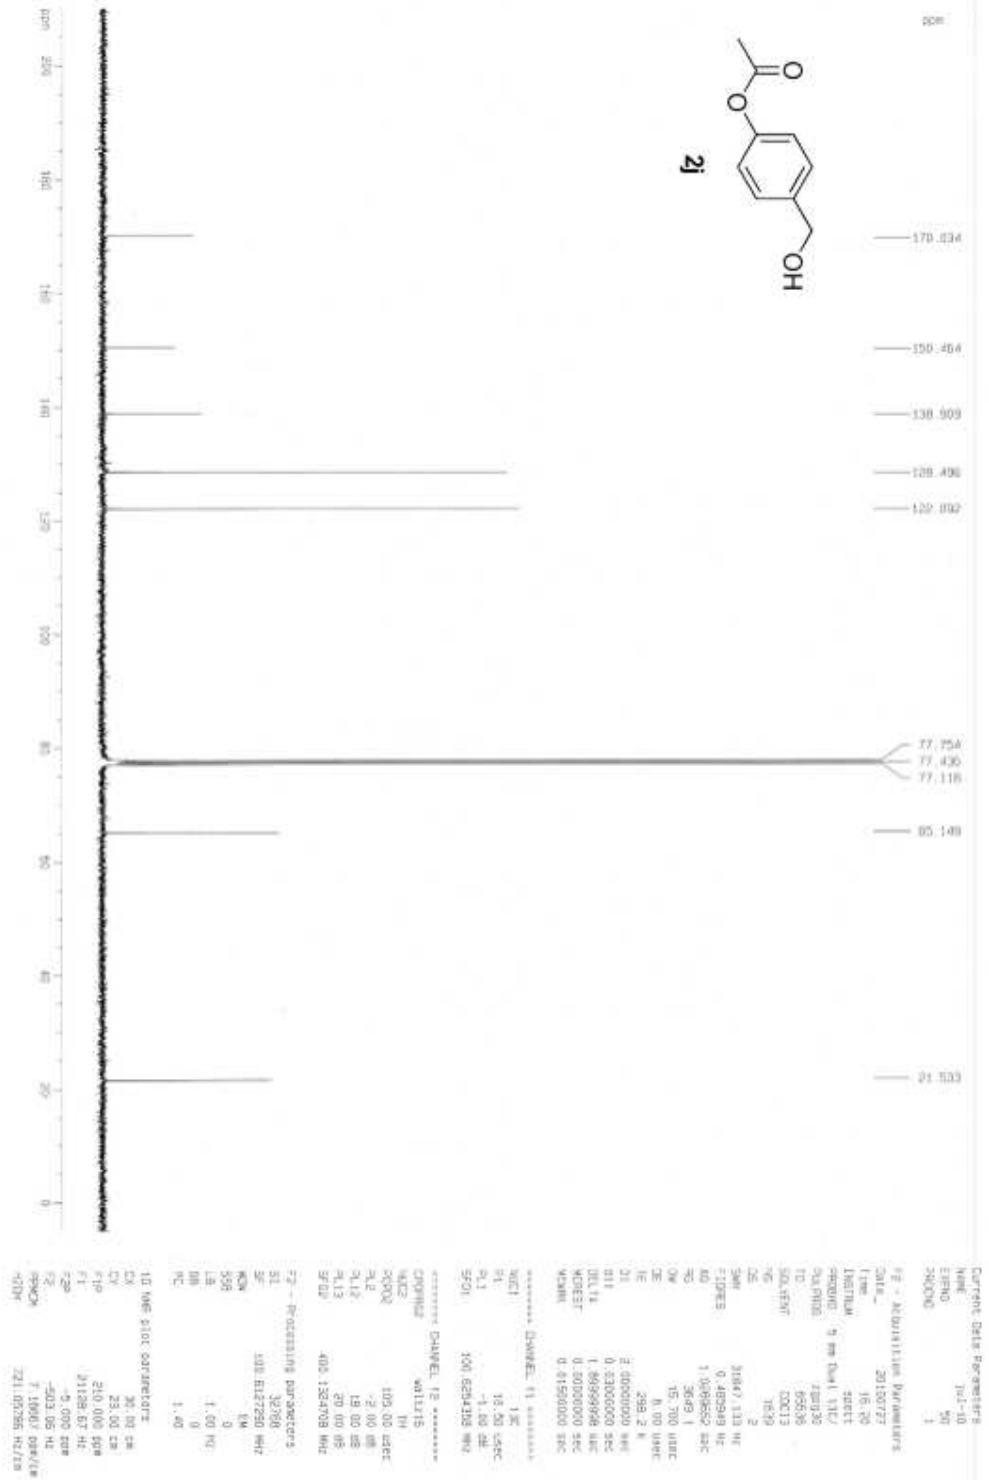







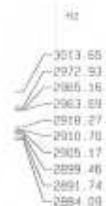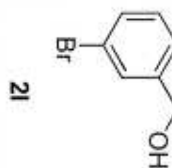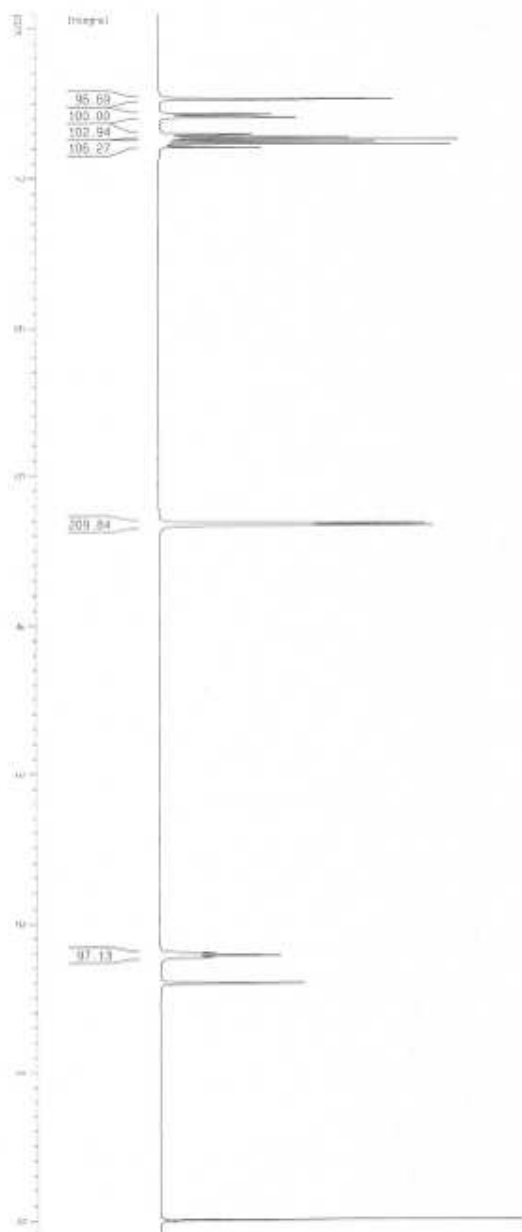

Current Data Parameters  
Name: 21-10  
EXPNO: 10  
PROCNO: 1  
Date\_: 2010/07/20  
Time: 15.43  
INSTRUM: spect  
PROBHD: 5 mm QNP 13C/1  
PULPROG: zgpg30  
TD: 32768  
SOLVENT: CDCl3  
NS: 32  
DS: 0  
SWH: 18213.645 Hz  
FIDRES: 0.220367 Hz  
AQ: 1.902344 sec  
RG: 409.1  
GB: 0  
DE: 60.000 MHz  
TE: 296.2 K  
D1: 1.50000000 sec  
WALTZ16: 0.20000000 sec  
KCMR: 0.01500000 sec

===== CHANNEL f1 =====  
NUC1: 13C  
P1: 11.00 usec  
PL1: -2.00 dB  
SFO1: 100.626110 MHz

F2 - Processing parameters  
SI: 32768  
SF: 100.626110 MHz  
WDW: EM  
SSB: 0  
LB: 0.30 Hz  
GB: 0  
PC: 1.00

1D 90MHz 13C Parameters  
CY: 30.00 usec  
CY: 9.00 usec  
P1P: 8.150 usec  
PL: 3240.00 Hz  
ZG: -10.150 dB  
ZP: -40.01 Hz  
SFOF2: 0.275353000 MHz  
HLEN: 105.000000 usec



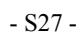



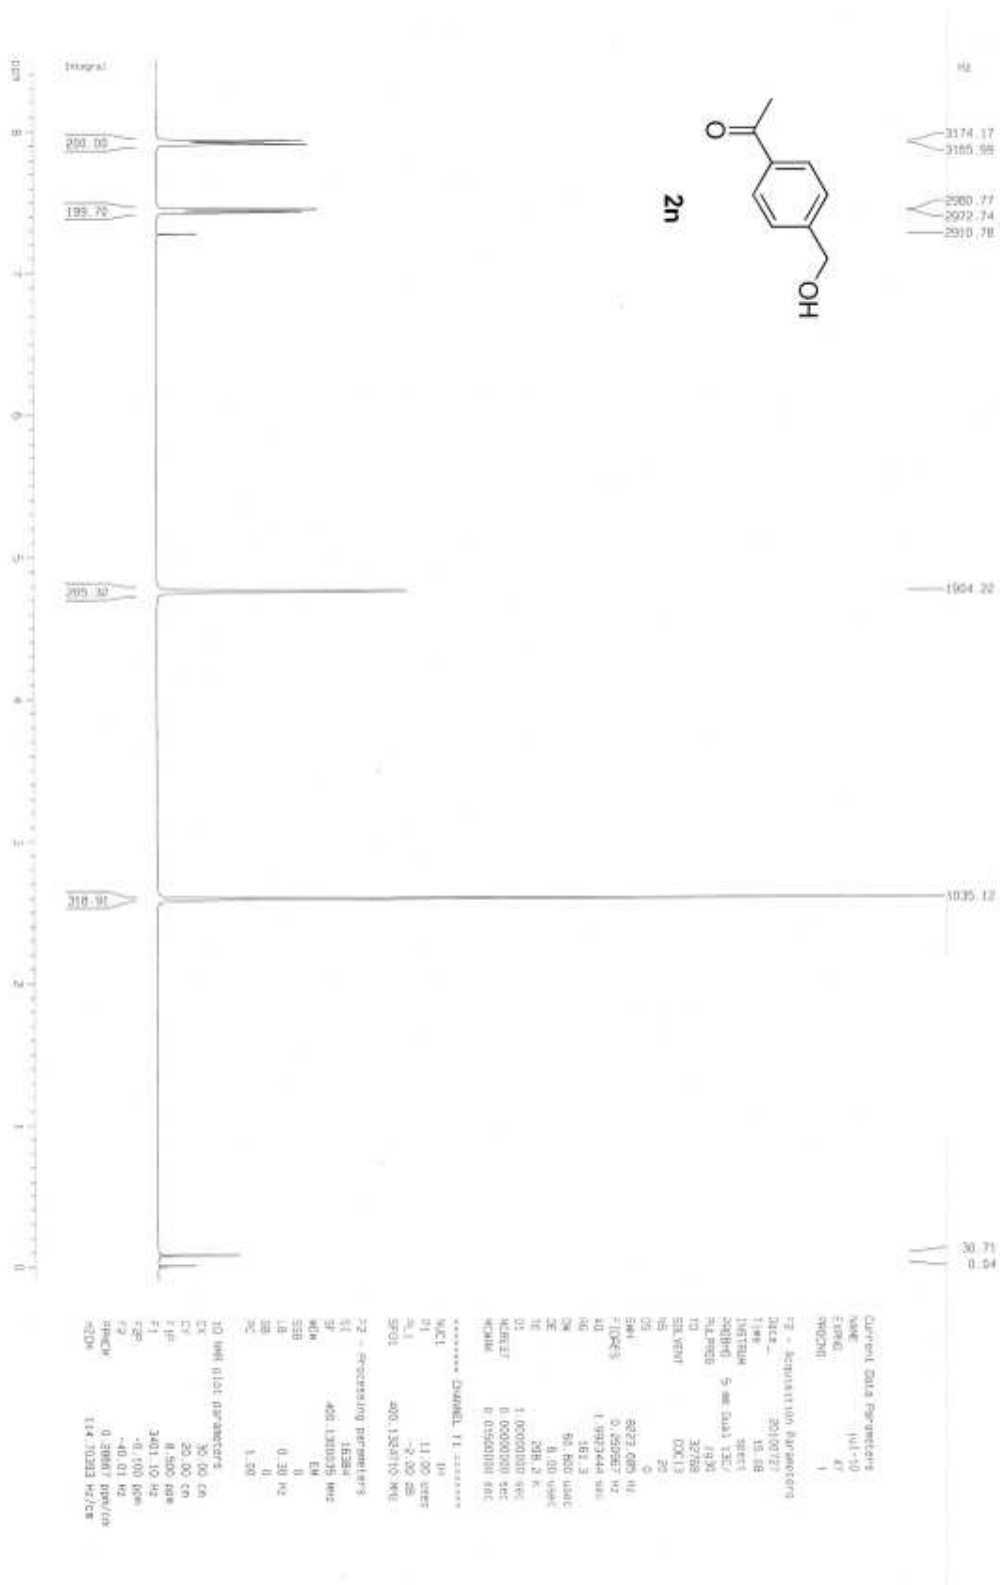

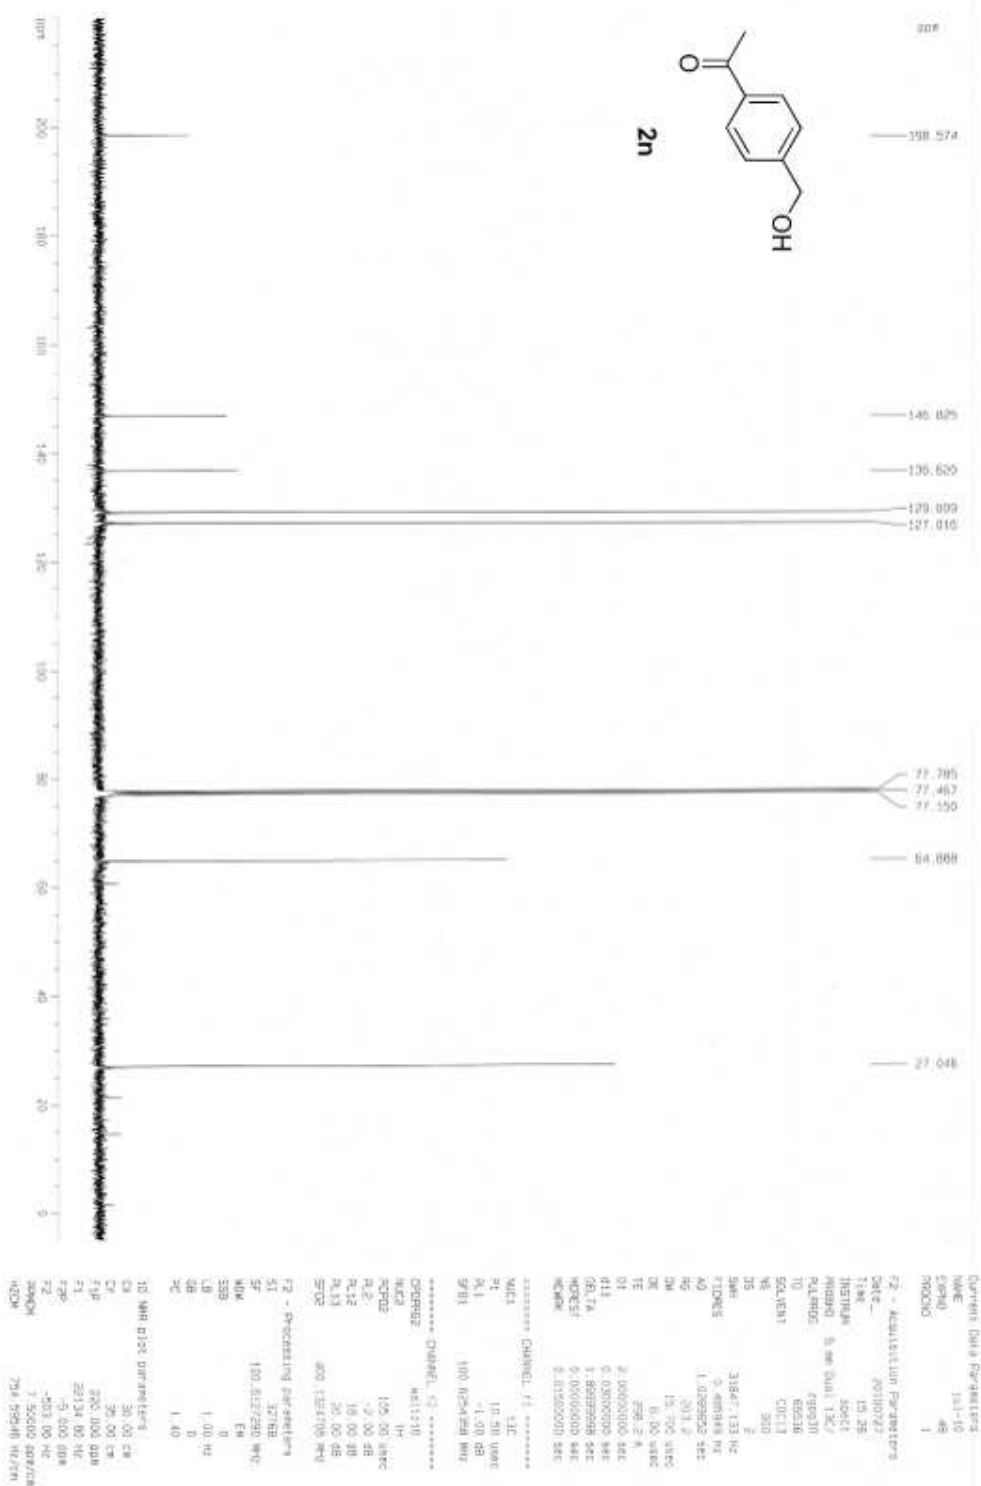









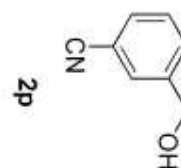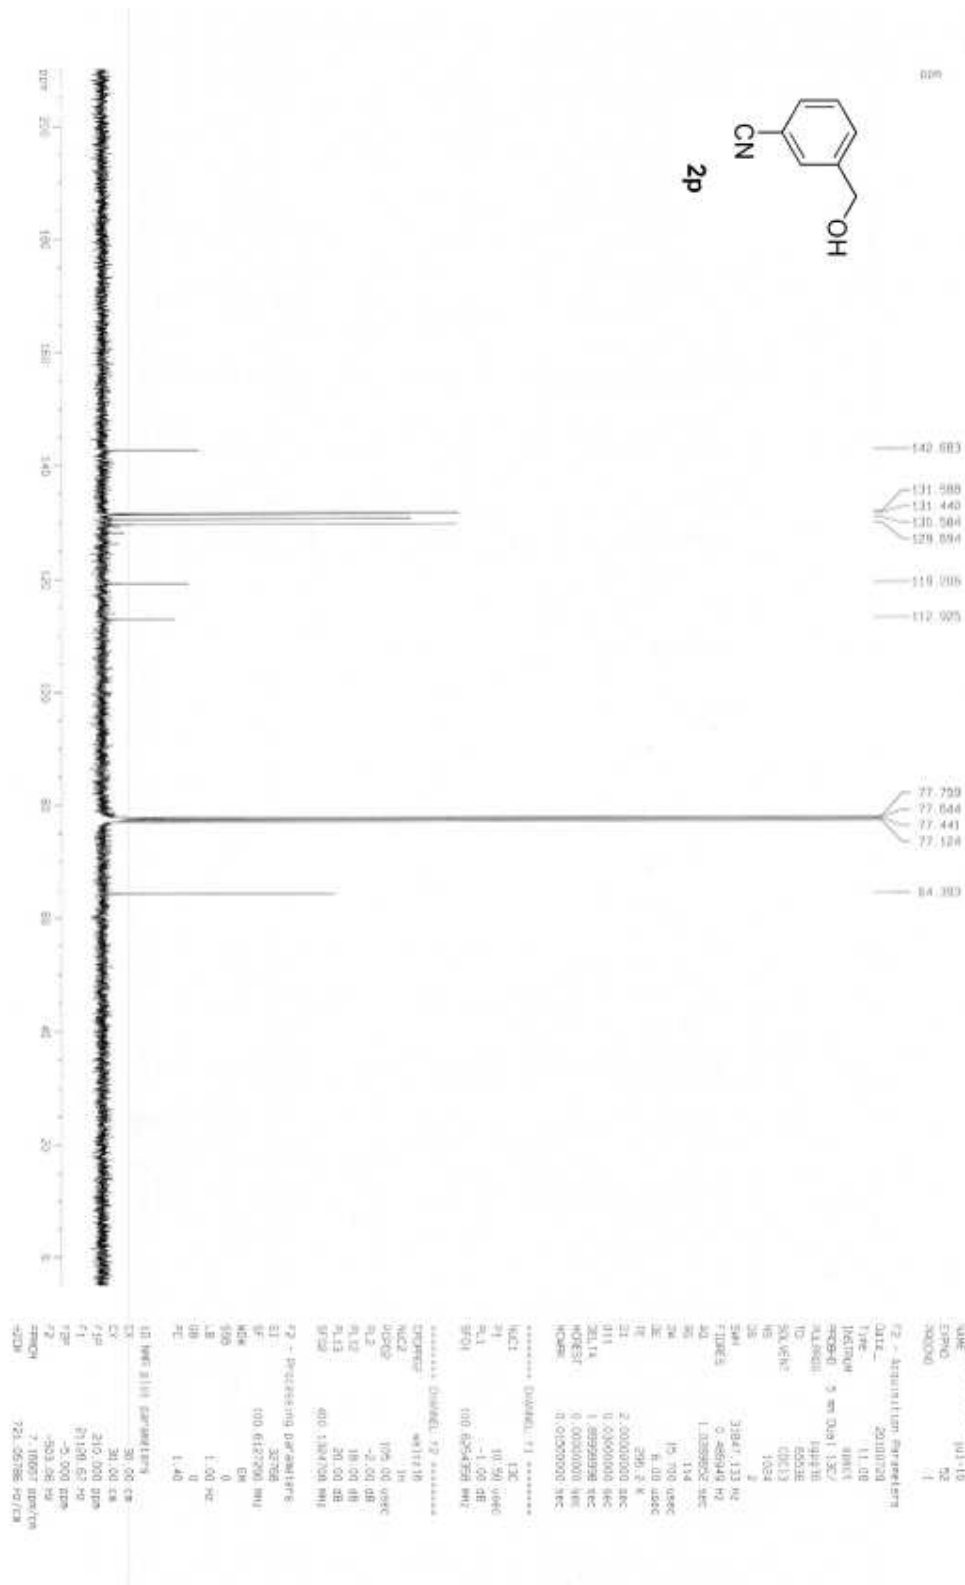





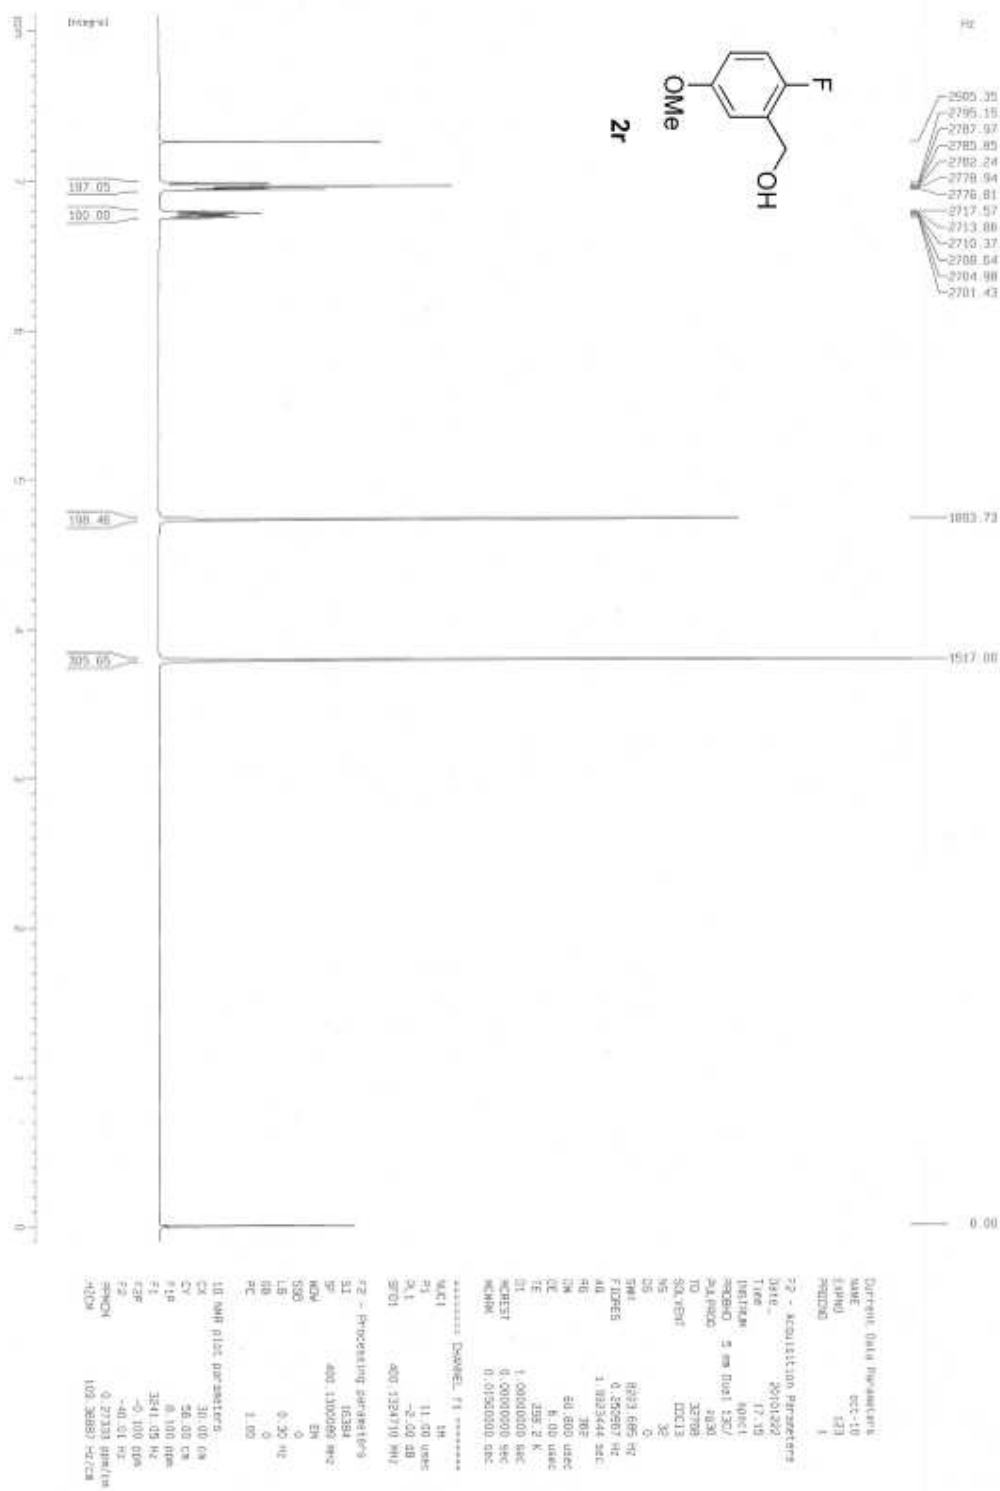



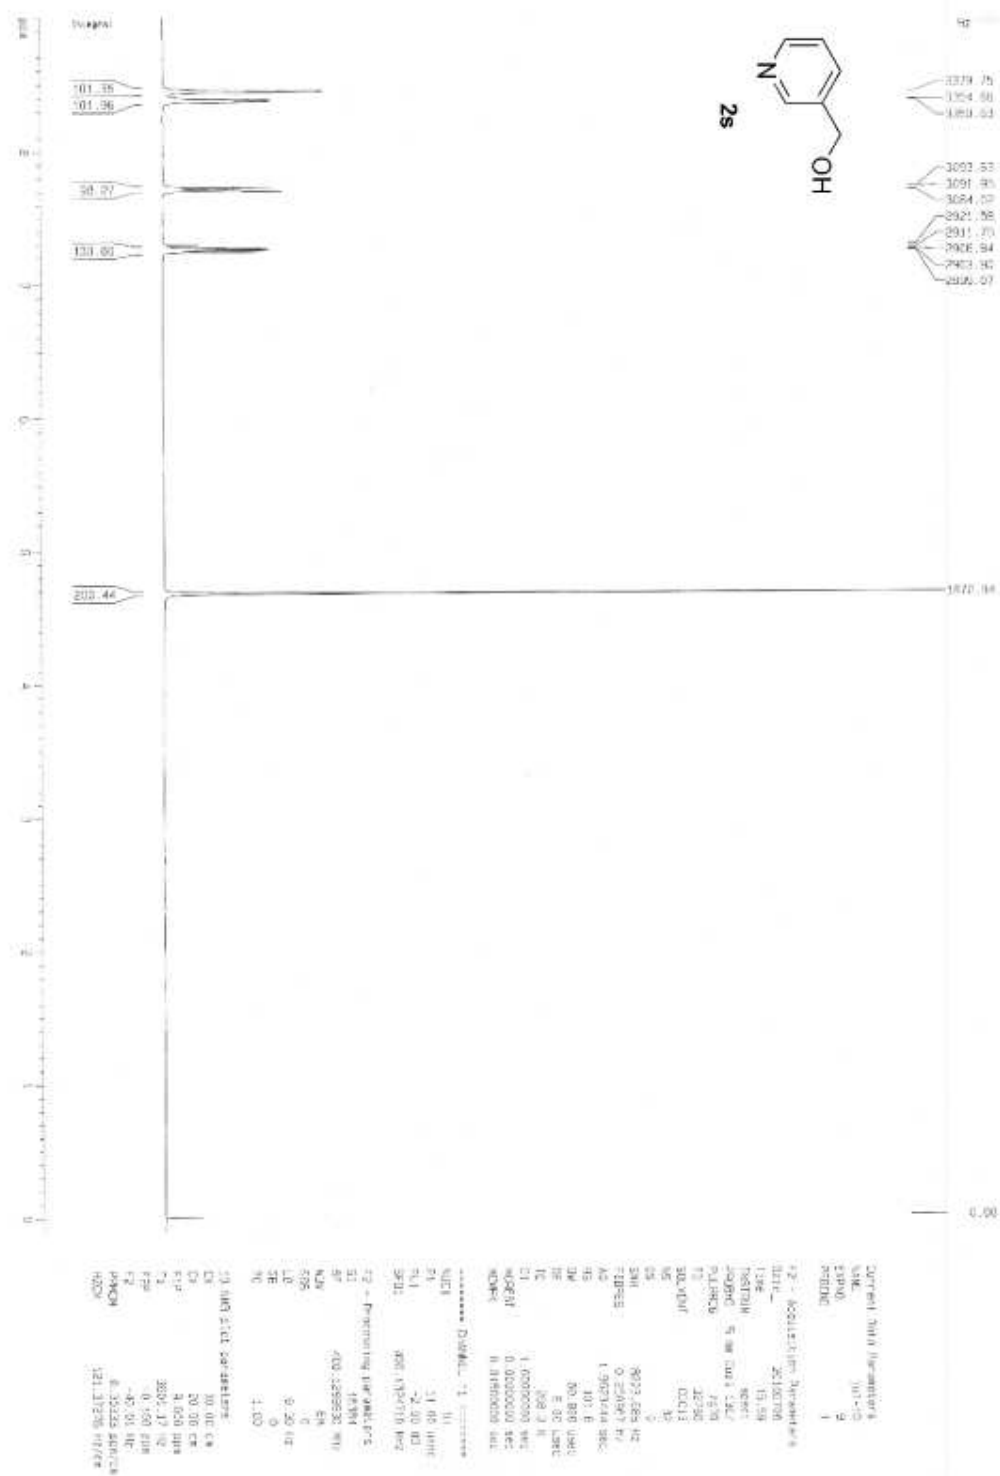

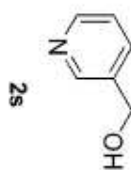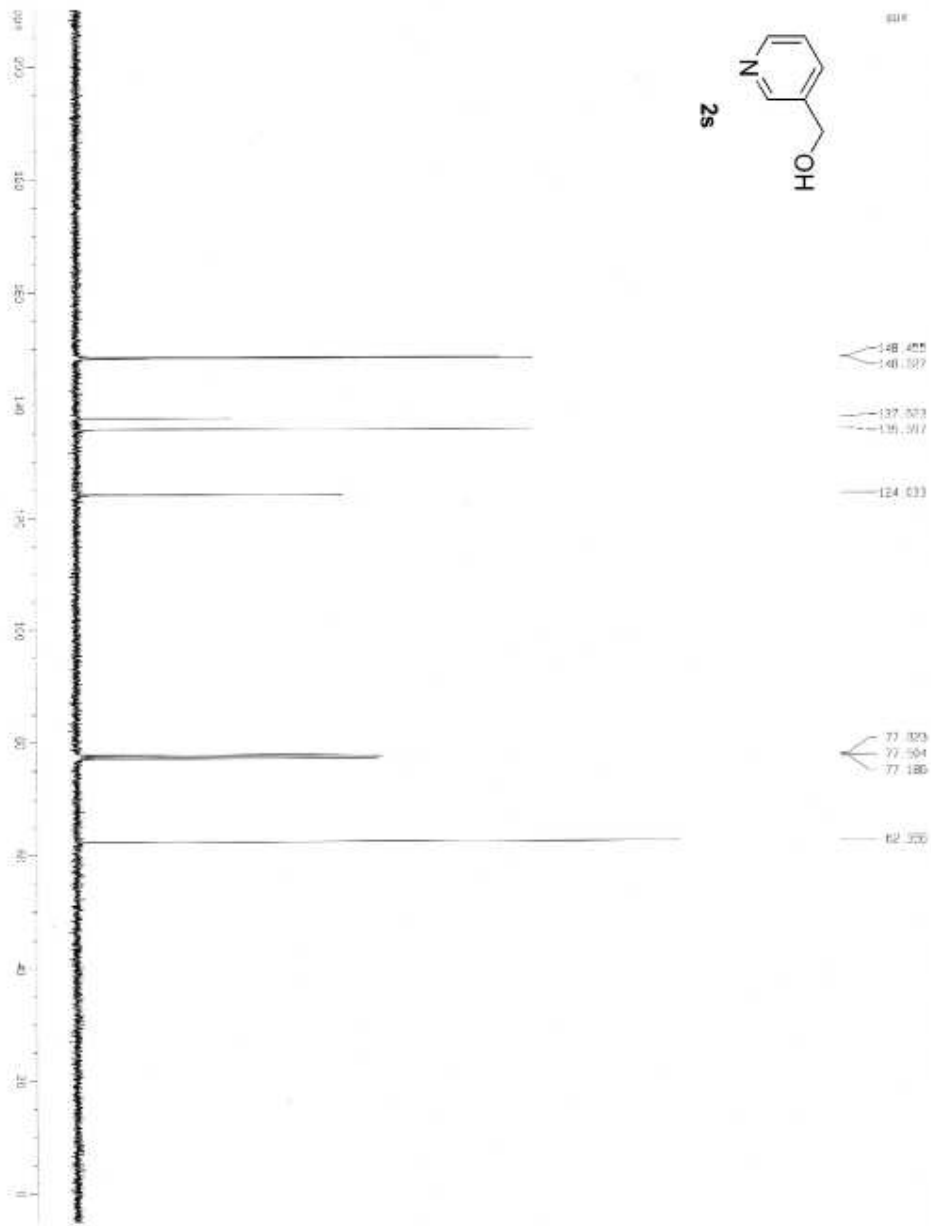

13C NMR Data Parameters  
 Name: 2s  
 ExpNo: 1  
 Date: 20100606  
 Time: 16:04  
 File: 2s13C  
 F2: 101.625 MHz  
 F1: 101.625 MHz  
 F0: 101.625 MHz  
 P1: 1.00 sec  
 P2: 1.00 sec  
 P3: 1.00 sec  
 P4: 1.00 sec  
 P5: 1.00 sec  
 P6: 1.00 sec  
 P7: 1.00 sec  
 P8: 1.00 sec  
 P9: 1.00 sec  
 P10: 1.00 sec  
 P11: 1.00 sec  
 P12: 1.00 sec  
 P13: 1.00 sec  
 P14: 1.00 sec  
 P15: 1.00 sec  
 P16: 1.00 sec  
 P17: 1.00 sec  
 P18: 1.00 sec  
 P19: 1.00 sec  
 P20: 1.00 sec  
 P21: 1.00 sec  
 P22: 1.00 sec  
 P23: 1.00 sec  
 P24: 1.00 sec  
 P25: 1.00 sec  
 P26: 1.00 sec  
 P27: 1.00 sec  
 P28: 1.00 sec  
 P29: 1.00 sec  
 P30: 1.00 sec  
 P31: 1.00 sec  
 P32: 1.00 sec  
 P33: 1.00 sec  
 P34: 1.00 sec  
 P35: 1.00 sec  
 P36: 1.00 sec  
 P37: 1.00 sec  
 P38: 1.00 sec  
 P39: 1.00 sec  
 P40: 1.00 sec  
 P41: 1.00 sec  
 P42: 1.00 sec  
 P43: 1.00 sec  
 P44: 1.00 sec  
 P45: 1.00 sec  
 P46: 1.00 sec  
 P47: 1.00 sec  
 P48: 1.00 sec  
 P49: 1.00 sec  
 P50: 1.00 sec  
 P51: 1.00 sec  
 P52: 1.00 sec  
 P53: 1.00 sec  
 P54: 1.00 sec  
 P55: 1.00 sec  
 P56: 1.00 sec  
 P57: 1.00 sec  
 P58: 1.00 sec  
 P59: 1.00 sec  
 P60: 1.00 sec  
 P61: 1.00 sec  
 P62: 1.00 sec  
 P63: 1.00 sec  
 P64: 1.00 sec  
 P65: 1.00 sec  
 P66: 1.00 sec  
 P67: 1.00 sec  
 P68: 1.00 sec  
 P69: 1.00 sec  
 P70: 1.00 sec  
 P71: 1.00 sec  
 P72: 1.00 sec  
 P73: 1.00 sec  
 P74: 1.00 sec  
 P75: 1.00 sec  
 P76: 1.00 sec  
 P77: 1.00 sec  
 P78: 1.00 sec  
 P79: 1.00 sec  
 P80: 1.00 sec  
 P81: 1.00 sec  
 P82: 1.00 sec  
 P83: 1.00 sec  
 P84: 1.00 sec  
 P85: 1.00 sec  
 P86: 1.00 sec  
 P87: 1.00 sec  
 P88: 1.00 sec  
 P89: 1.00 sec  
 P90: 1.00 sec  
 P91: 1.00 sec  
 P92: 1.00 sec  
 P93: 1.00 sec  
 P94: 1.00 sec  
 P95: 1.00 sec  
 P96: 1.00 sec  
 P97: 1.00 sec  
 P98: 1.00 sec  
 P99: 1.00 sec  
 P100: 1.00 sec



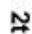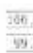[illegible]

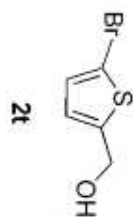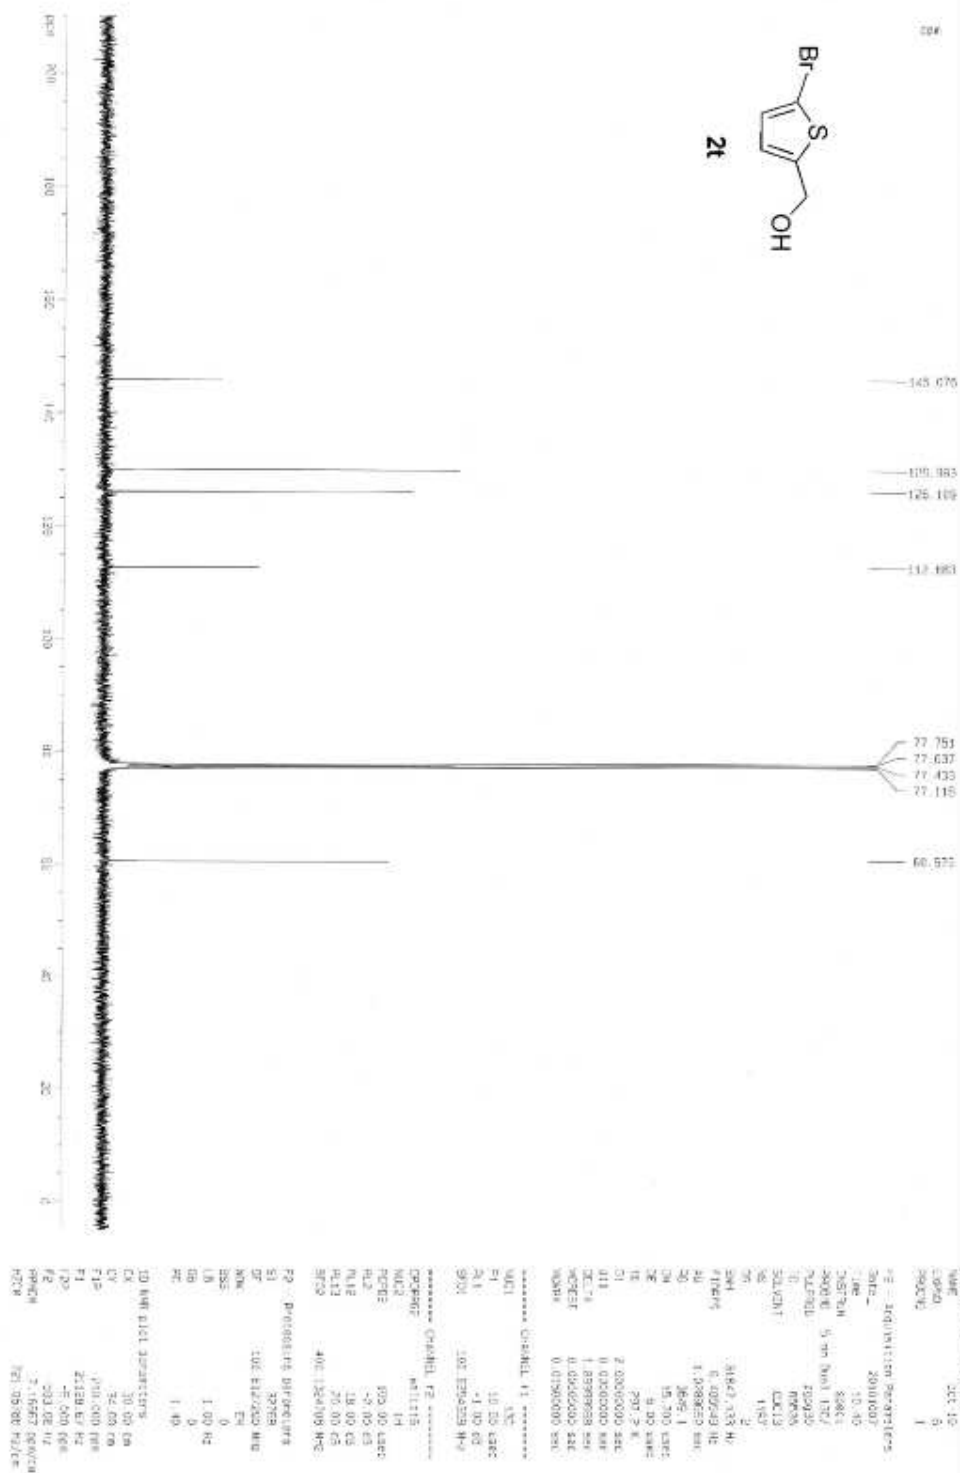



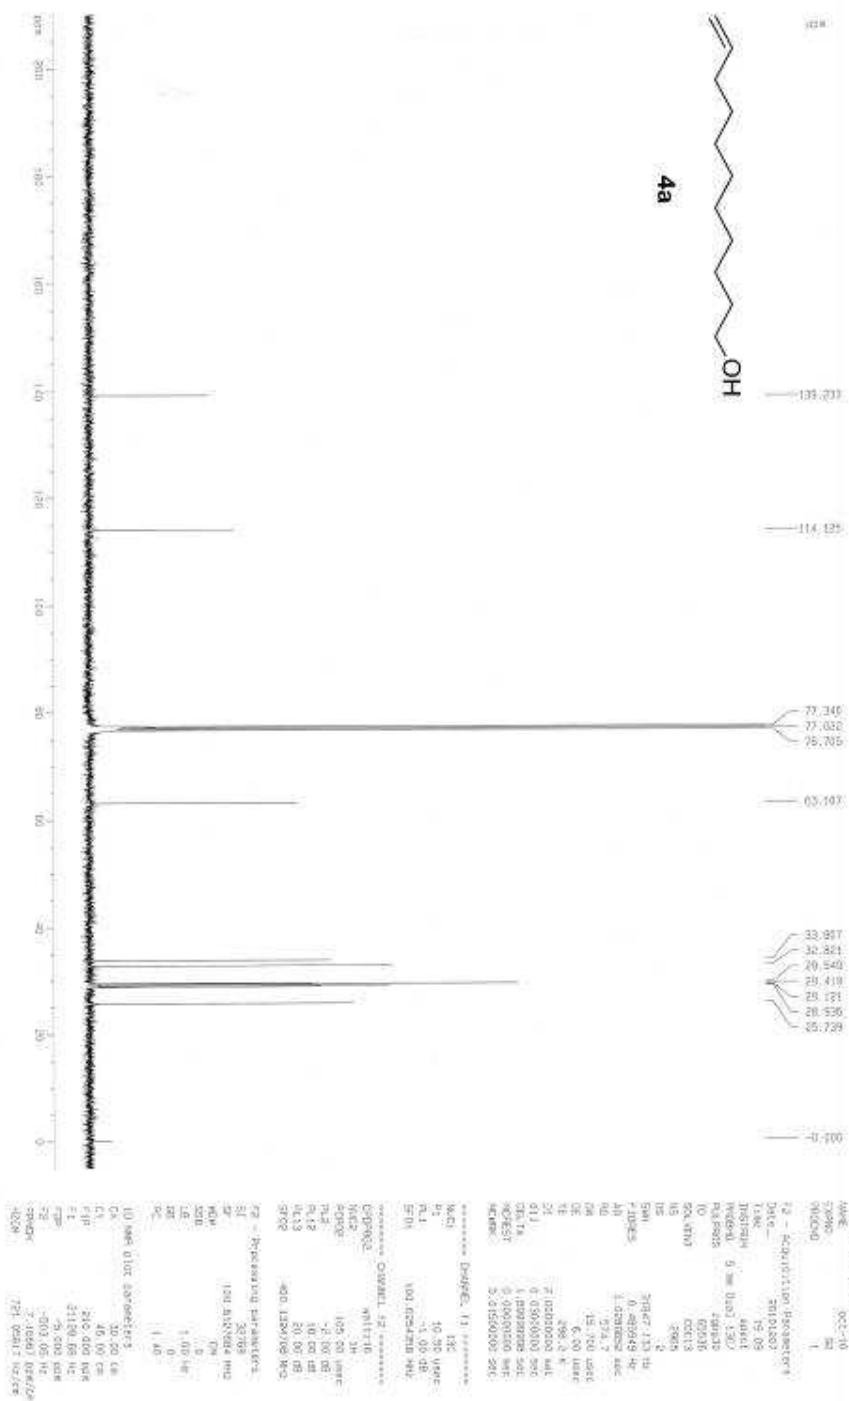

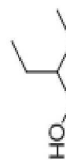

4b

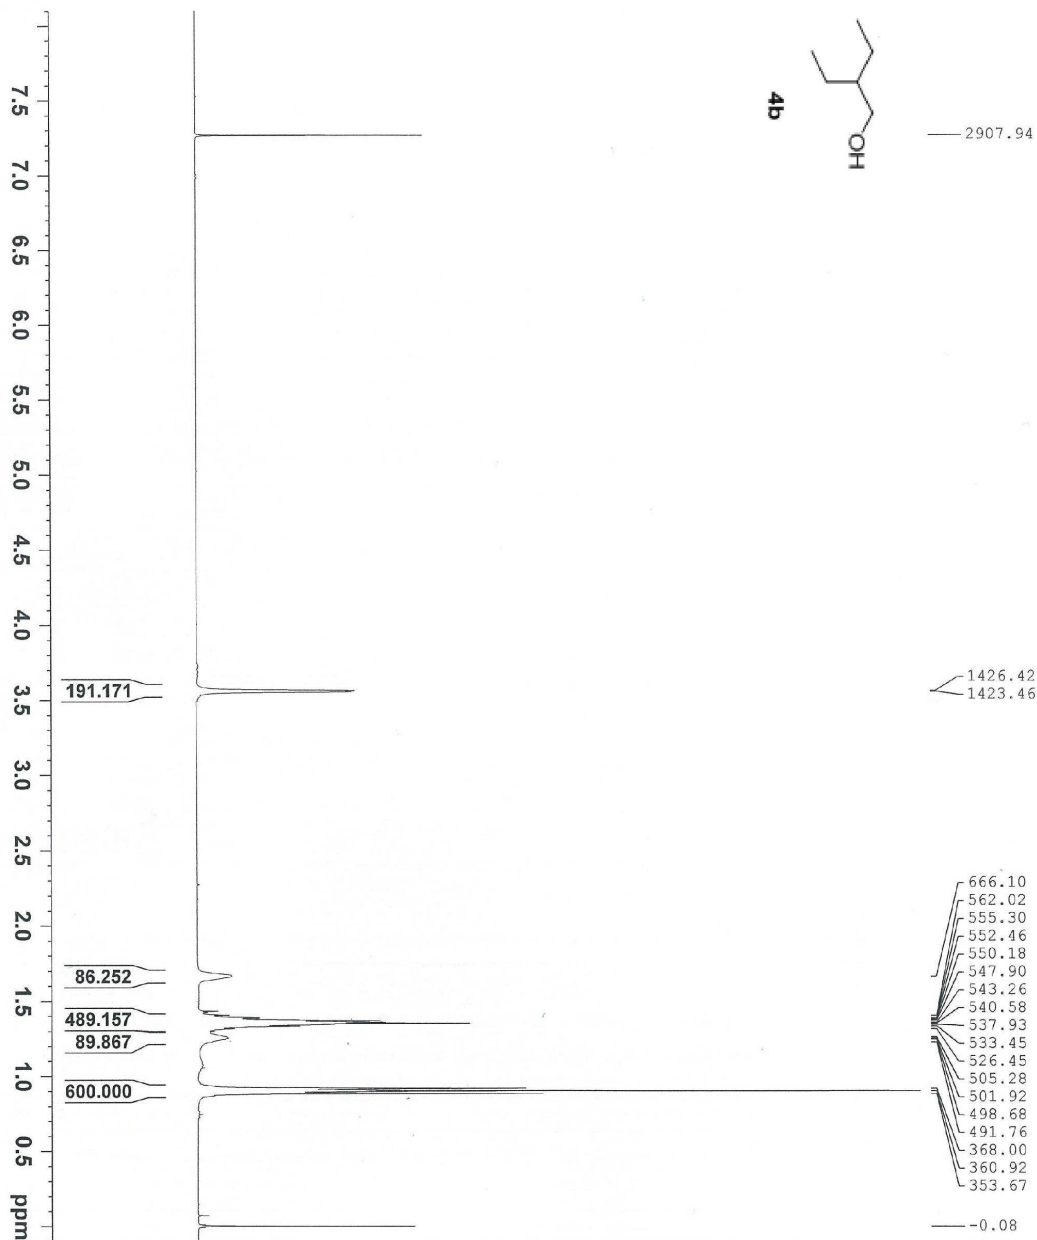

Current Data Parameters  
NAME RTR-2-ethylbutanol  
EXPNO 1  
PROCNO 1

F2 - Acquisition Parameters  
Date\_ 20120412  
Time 14.34  
INSTRUM spect  
PROBHD 5 mm PABO BB/  
PULPROG zg30  
TD 65536  
SOLVENT CDCl3  
NS 16  
DS 2  
SWH 8223.685 Hz  
FIDRES 0.125483 Hz  
AQ 3.9846387 sec  
RG 99.16  
DW 60.800 usec  
DE 6.50 usec  
TE 292.8 K  
D1 1.00000000 sec  
TDO 1

===== CHANNEL f1 =====  
NUC1 1H  
P1 15.00 usec  
PLW1 12.60000038 W  
SFO1 400.1324710 MHz

F2 - Processing parameters  
SI 65536  
SF 400.130070 MHz  
WDW EM  
SSB 0  
LB 0.30 Hz  
GB 0  
PC 1.00

77.404  
77.085  
76.767

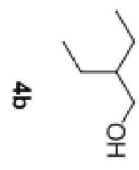

64.522

43.352

22.743

10.972

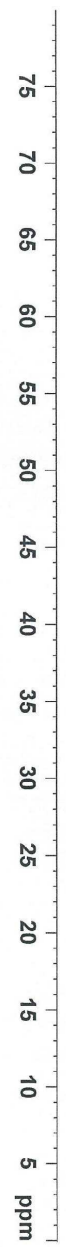

```

Current Data Parameters
NAME      RTK-2ethylbutanol
EXPNO     2
PROCNO    1

F2 - Acquisition Parameters
Date_     20120418
Time      16.11
INSTRUM   spect
PROBHD    5 mm PABBO BBO
PULPROG   zgpg30
TD         65536
SOLVENT   CDCl3
NS         256
DS         4
SWH        24038.461 Hz
FIDRES     0.366798 Hz
AQ         1.3631988 sec
RG          186.53
DM          20.800 usec
DE          6.50 usec
TE         292.7 K
D1         2.00000000 sec
D11        0.03000000 sec
TD0        1

===== CHANNEL f1 =====
NUC1       13C
P1         9.98 usec
PLM1       52.0999847 W
SFO1       100.628293 MHz

===== CHANNEL f2 =====
CPDPRG2    waltz16
NUC2        1H
PCPD2       90.00 usec
PLM2       12.60000038 W
PLM12      0.34999999 W
PLM13      0.28349999 W
SFO2       400.1316005 MHz

F2 - Processing parameters
SI         32768
SF         100.6127690 MHz
WDW        EM
SSB        0
LB         1.00 Hz
GB         0
PC         1.40
  
```



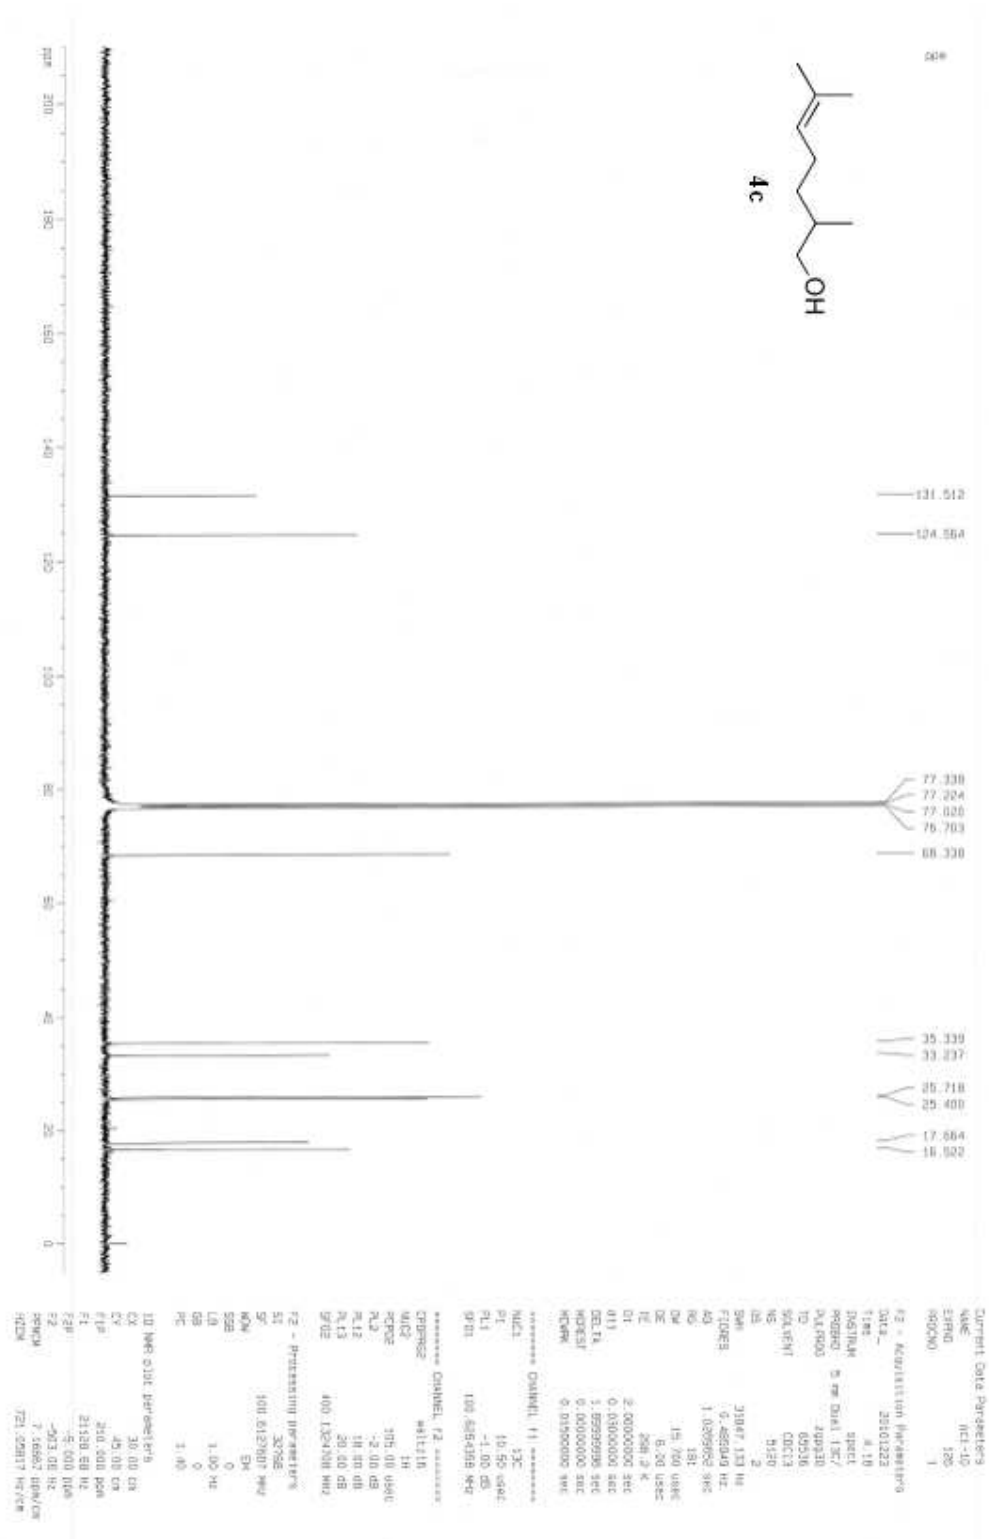



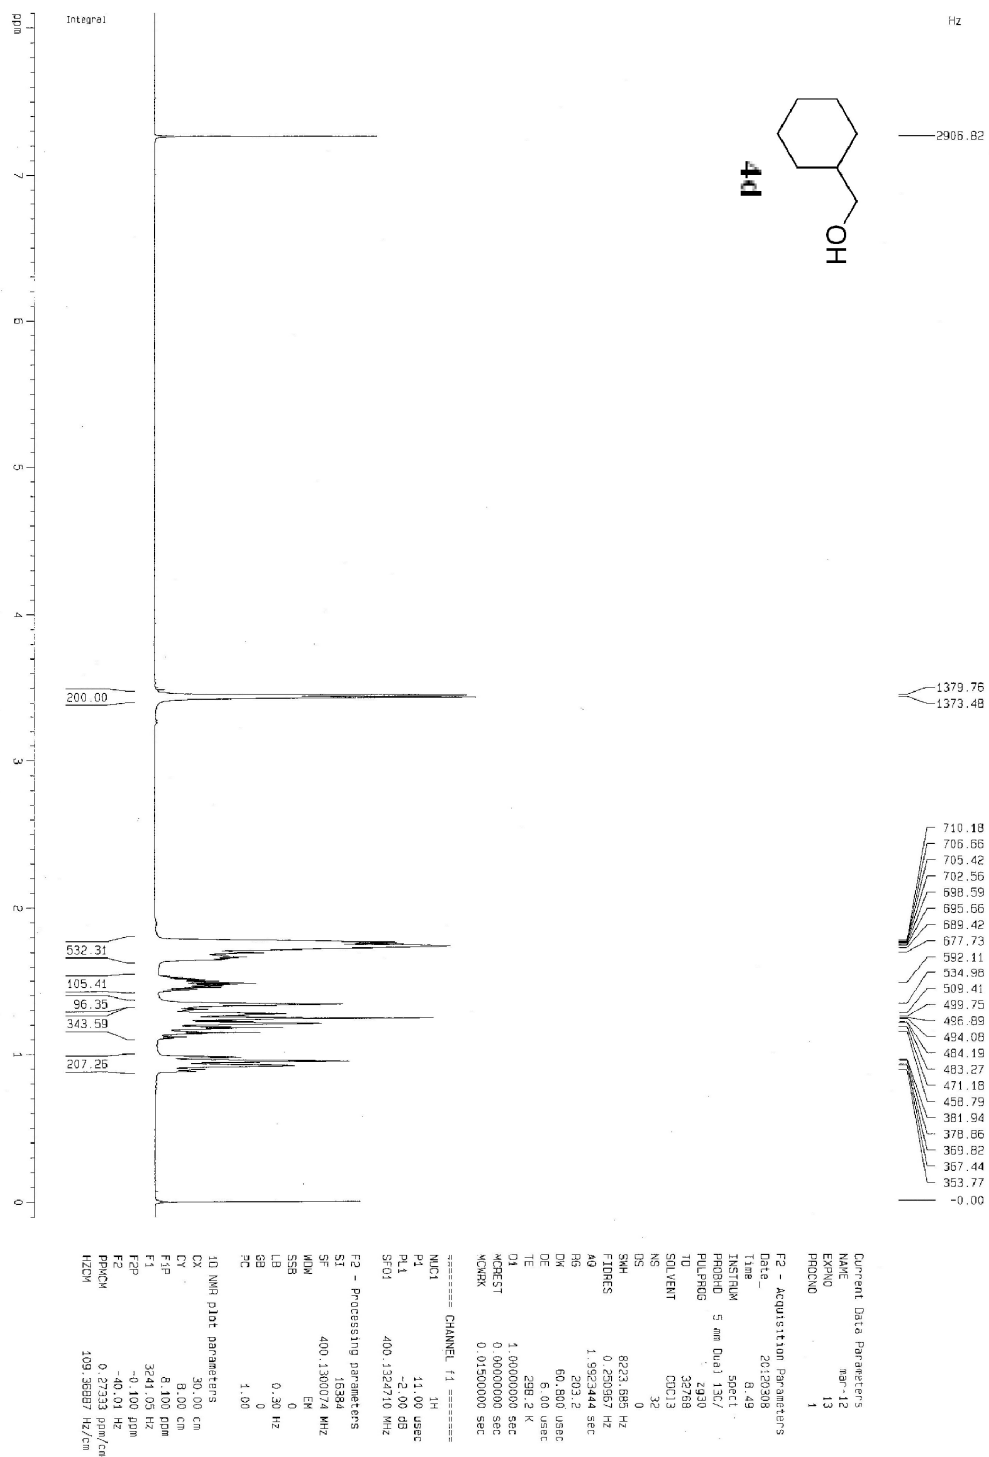

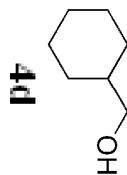

ppm

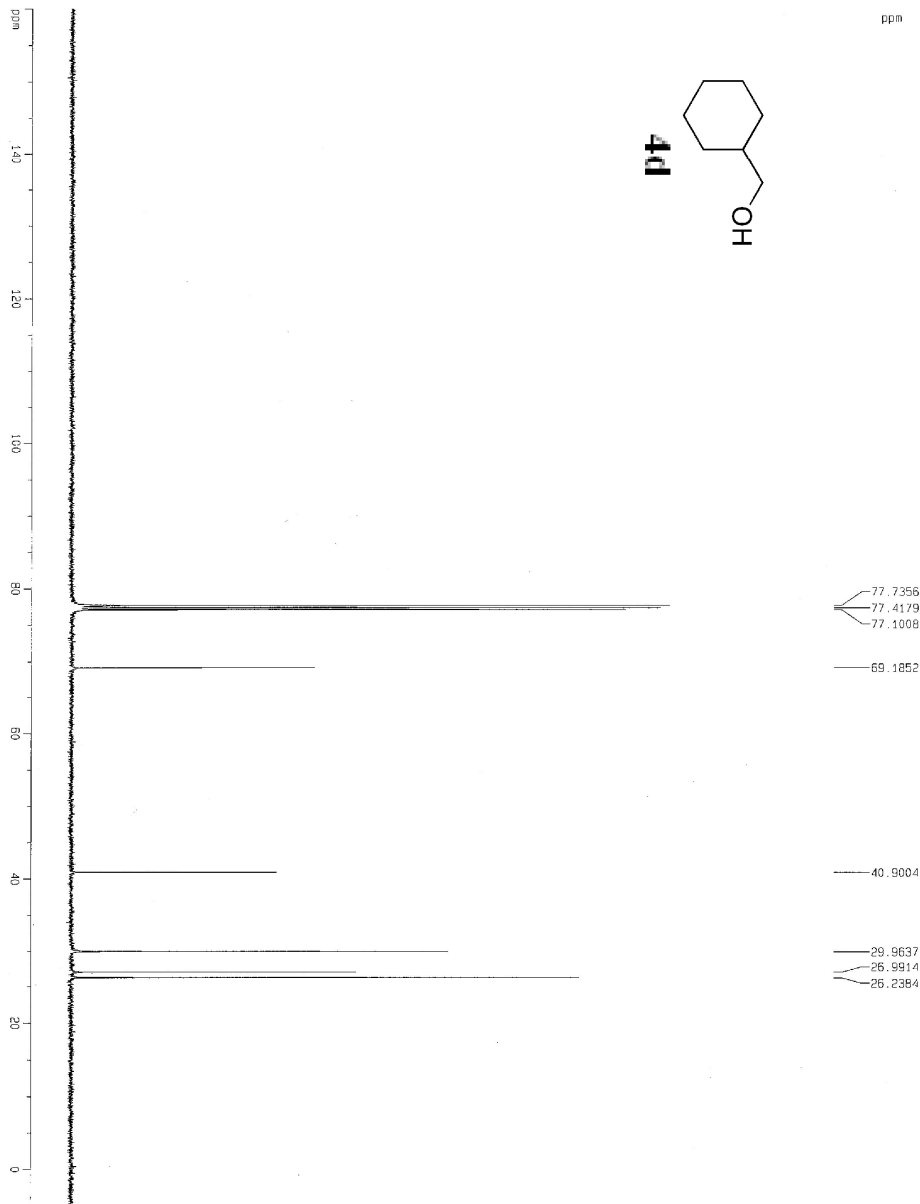

Current Data Parameters  
NAME: expn-12  
EXPNO: 14  
PROCNO: 1

F2 - Acquisition Parameters  
Date\_: 20120308  
Time: 10.18  
INSTRUM: spect  
PROBHD: 5 mm QNP 13C/  
PULPROG: zgpg30  
TD: 65536  
SOLVENT: CDCl3  
NS: 2048  
DS: 2  
SWH: 31847.133 Hz  
FIDRES: 0.485949 Hz  
AQ: 1.028952 sec  
RG: 3649.1  
DW: 15.700 usec  
DE: 6.00 usec  
TE: 298.2 K  
D1: 2.00000000 sec  
d11: 0.03000000 sec  
DELTA: 1.89999998 sec  
MPCESY: 0.00000000 sec  
MCKEK: 0.01500000 sec

===== CHANNEL f1 =====  
NUC1: 13C  
P1: 10.50 usec  
PL1: -1.00 dB  
SFO1: 100.6254358 MHz

===== CHANNEL f2 =====  
CPOPRG2: waltz16  
NUC2: 1H  
PCPD2: 105.00 usec  
PL2: -2.00 dB  
PL12: 18.00 dB  
PL13: 20.00 dB  
SFO2: 400.1324708 MHz

F2 - Processing parameters  
SI: 32768  
SF: 100.6127290 MHz  
WDW: EM  
SSB: 0  
LB: 1.00 Hz  
GB: 0  
PC: 1.40

1D NMR plot parameters  
CY: 30.00 cm  
F1P: 15.00 cm  
F1: 160.000 DDM  
F2P: -5.000 DDM  
F2: -505.06 Hz  
FREQH: 513.0000 DDM/CM  
HZOH: 553.37006 Hz/CM

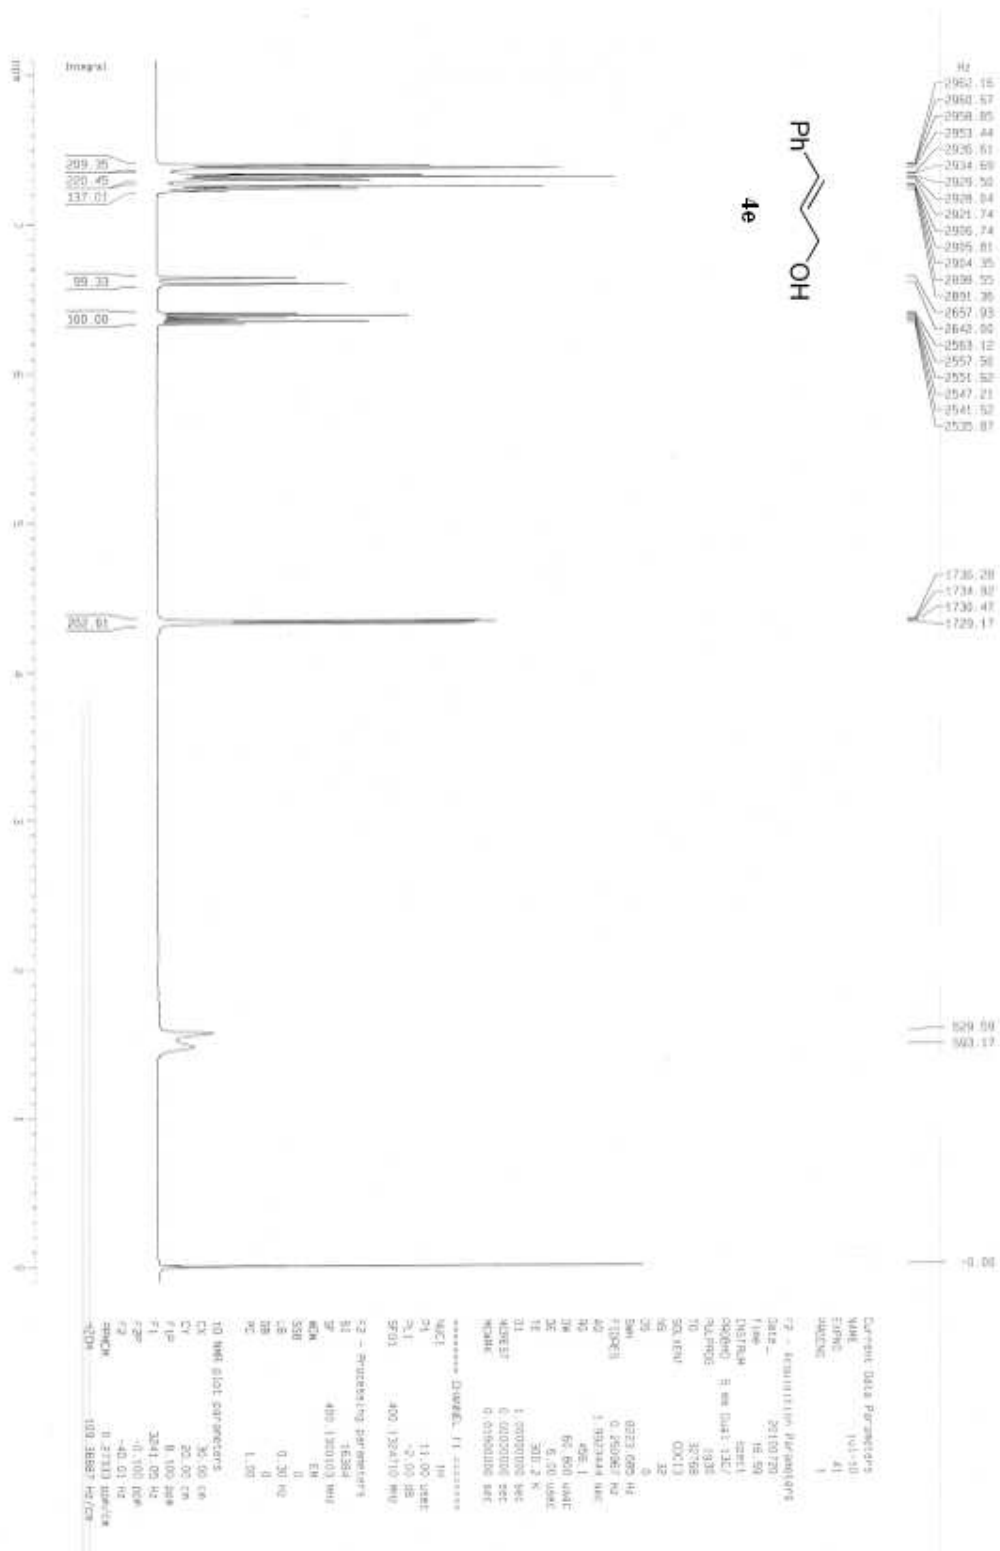

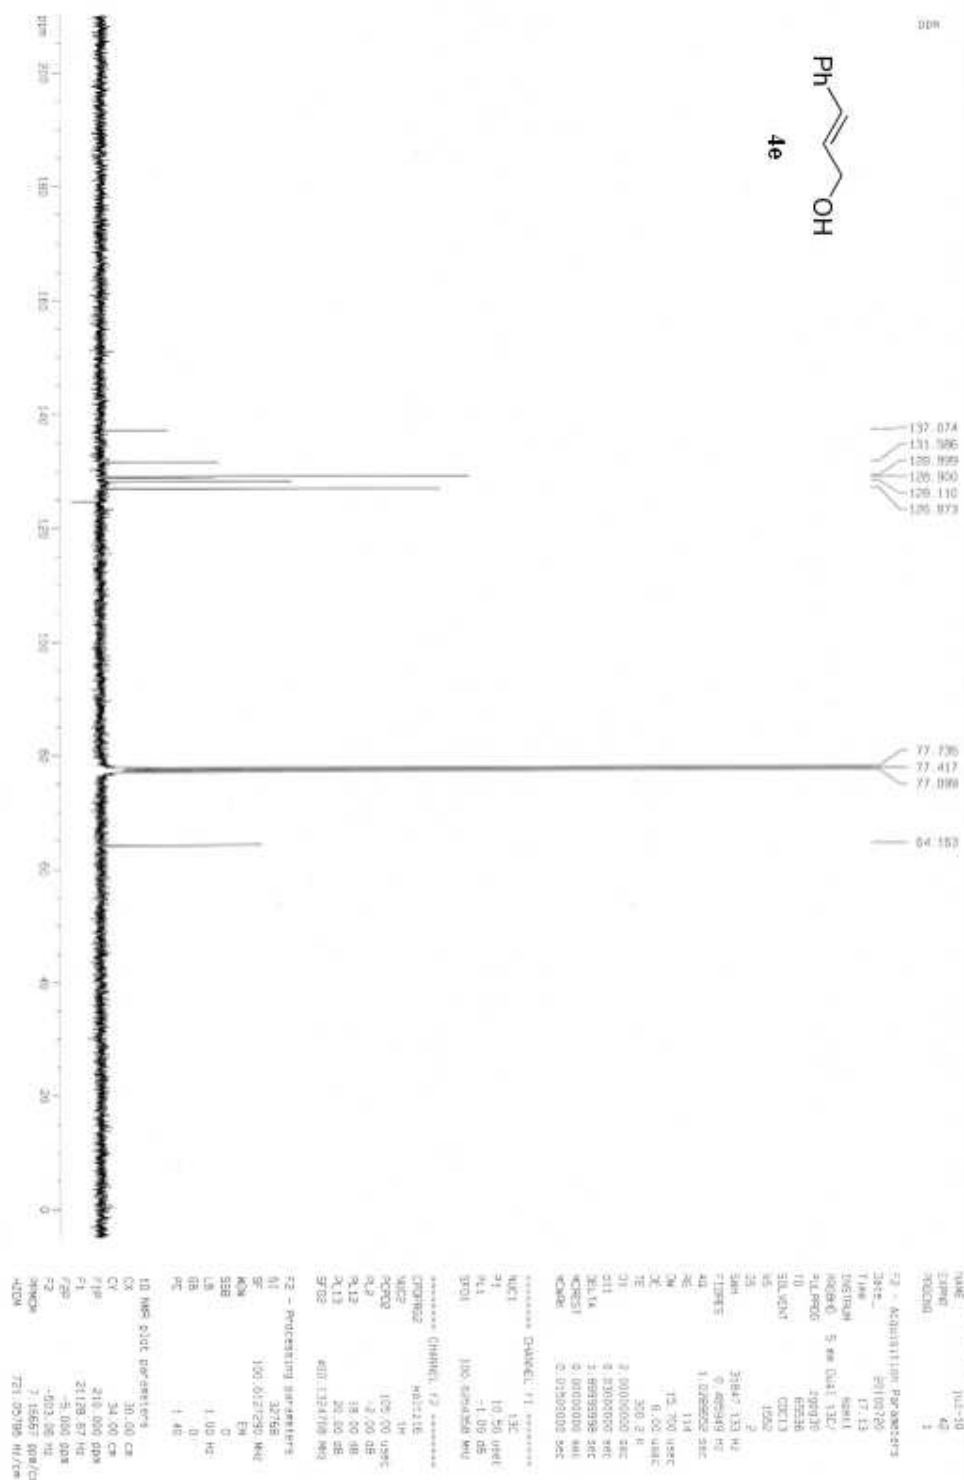

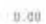

41

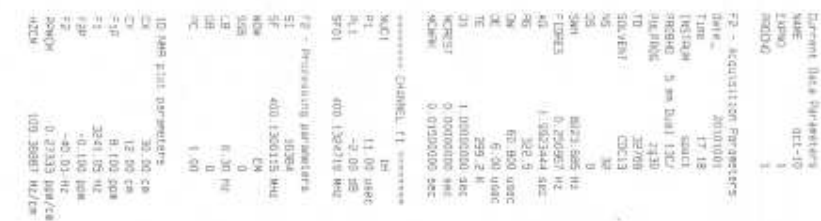

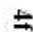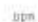

$\begin{array}{l} \diagup \\ \text{---} \\ \diagdown \end{array}$  77, 793  
 $\begin{array}{l} \diagup \\ \text{---} \\ \diagdown \end{array}$  77, 435  
 $\begin{array}{l} \diagup \\ \text{---} \\ \diagdown \end{array}$  77, 138  
 $\text{---}$  80, 1123

100

2010/001

17-300  
 1000012

Date Rec'd: 10/14/20

06/17 06/17

1000

0-885044-14-7

1.025850E 596  
3648 1\$5.00 USD  
\$50.00 USD

CHINESE

076 956 6565

0.01500000 sec

11

10 500 056

doi:10.1017/S0007122612000069

17

三

00000000

00000000

20 00 CE

THE UNIVERSITY OF CHICAGO

20768

$$m \geq 1$$

1:00 PM

3.00

30.00 mm

15.00 17  
240.000 1821320-07 HQ  
-5,000 pp

7.16567 00  
-503.06 Hz

221-95760, INC

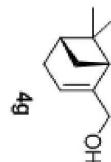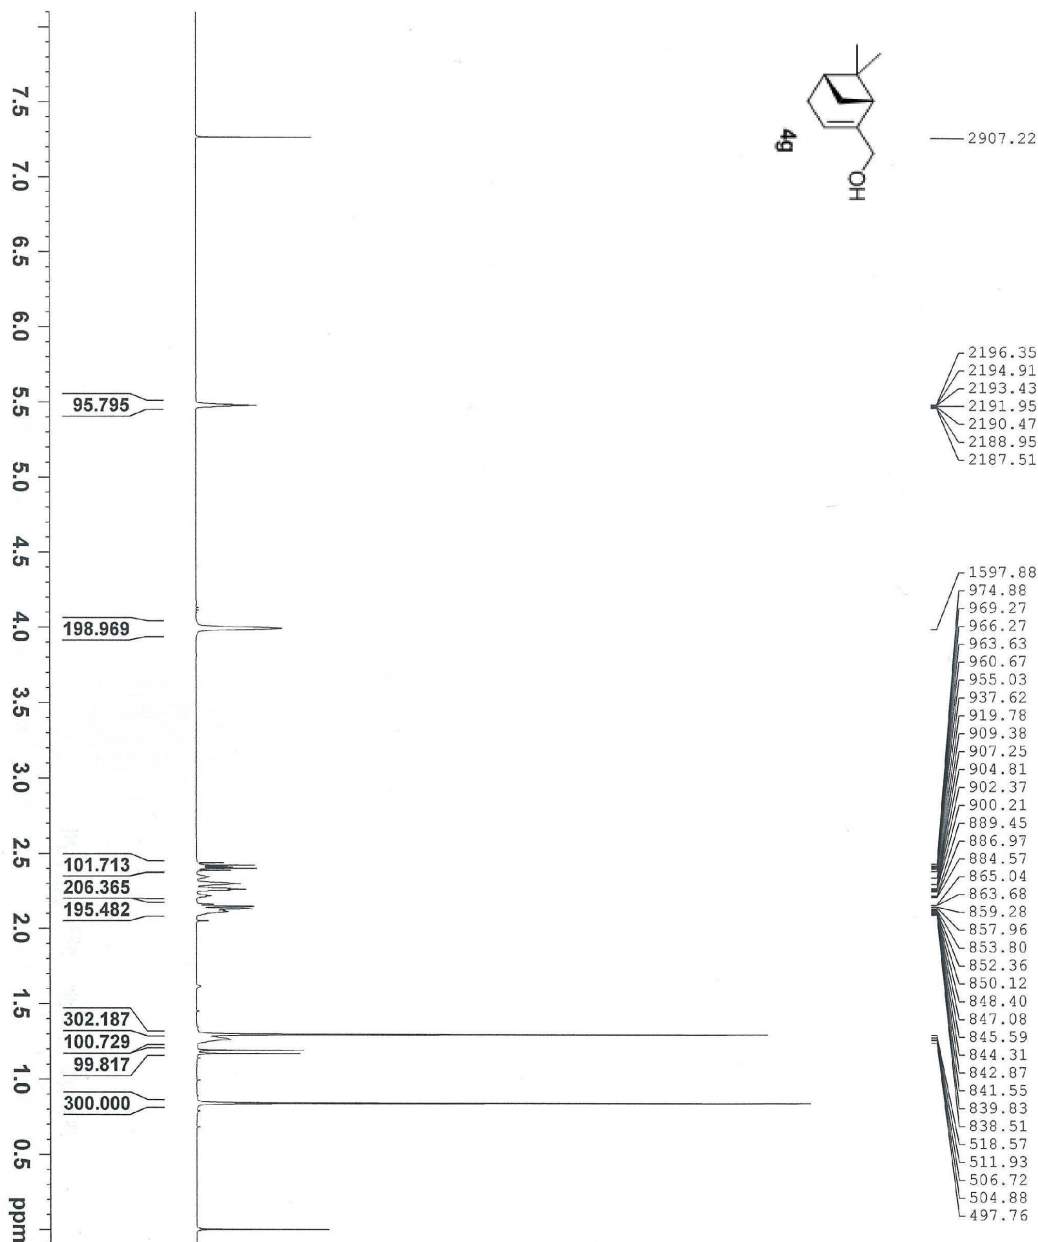

Current Data Parameters  
NAME RTM-061  
EXPNO 1  
PROCNO 1

F2 - Acquisition Parameters  
Date\_ 20120418  
Time\_ 14.44  
INSTRUM spect  
PROBHD 5 mm PABBO BB/  
PULPROG zg30  
TD 65536  
SOLVENT CDCl3  
NS 16  
DS 2  
SWH 8223.685 Hz  
FIDRES 0.125483 Hz  
AQ 3.9846387 sec  
RG 99.16  
DW 60.800 usec  
DE 6.50 usec  
TE 291.4 K  
D1 1.0000000 sec  
TD0 1

===== CHANNEL f1 =====  
NUC1 1H  
P1 15.00 usec  
PL1 12.6000038 W  
SFO1 400.1324710 MHz

F2 - Processing parameters  
SI 65536  
SF 400.130077 MHz  
WDW EM  
SSB 0  
IB 0  
GB 0  
PC 1.00

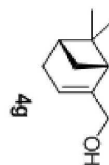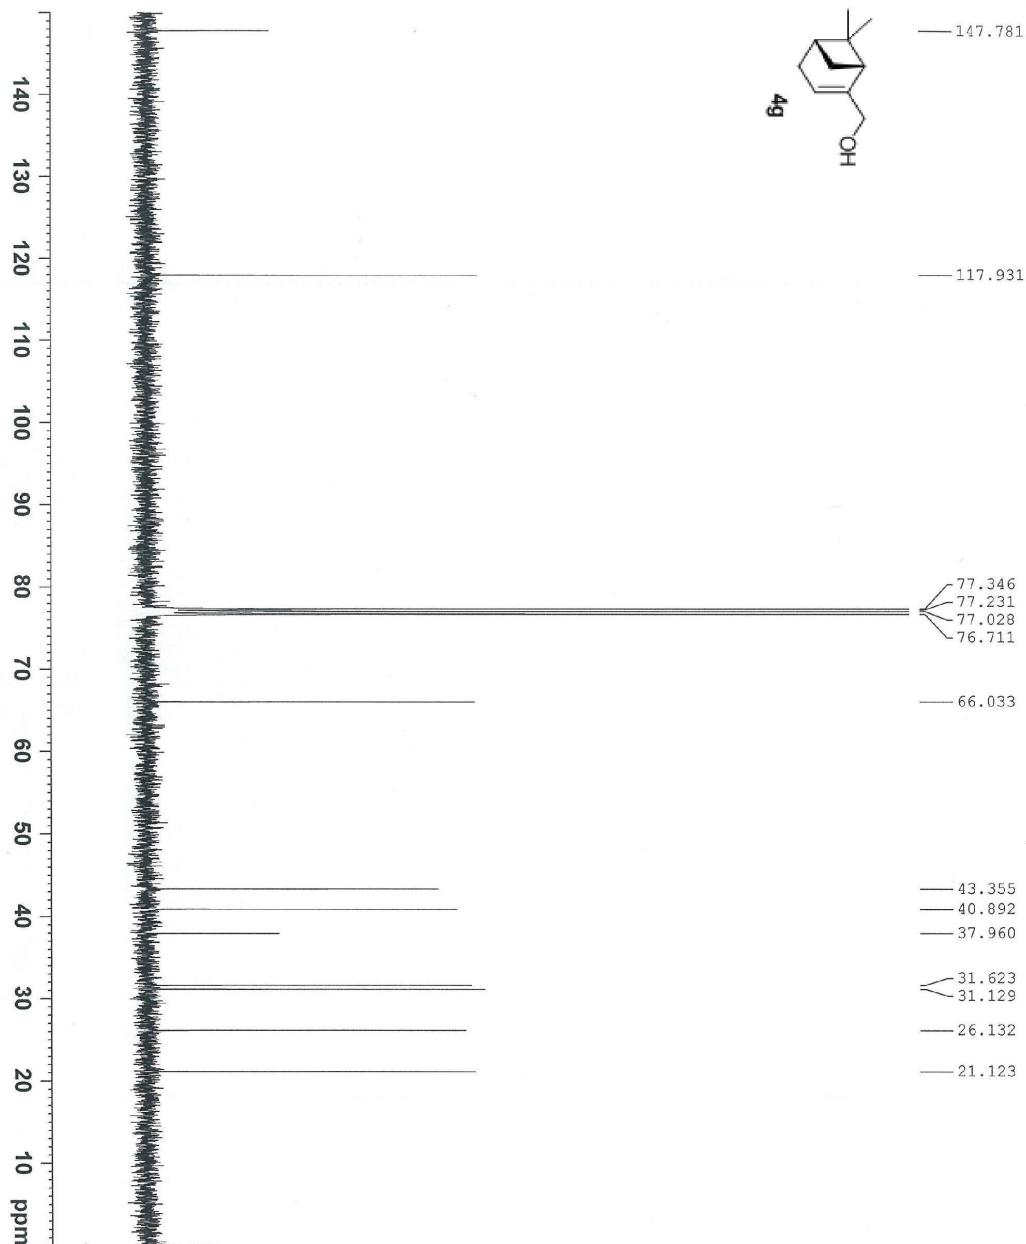

Current Data Parameters  
NAME RUK-856  
EXPNO 2  
PROCNO 1

F2 - Acquisition Parameters  
Date\_ 20120416  
Time\_ 22.39  
INSTRUM spect  
PROBHD 5 mm F4BBO BB/  
PULPROG zgpg30  
TD 65536  
SOLVENT CDCl3  
NS 1024  
DS 4  
SWH 24038.461 Hz  
FIDRES 0.366798 Hz  
AQ 1.3631988 sec  
RG 186.53  
DM 20.800 usec  
DE 6.50 usec  
TE 292.8 K  
D1 2.00000000 sec  
D11 0.03000000 sec  
TD0 1

===== CHANNEL f1 =====  
NUC1 13C  
P1 9.98 usec  
PL1 52.09999847 W  
SFO1 100.6228293 MHz

===== CHANNEL f2 =====  
CPDPRG2 waltz16  
NUC2 1H  
PCPD2 90.00 usec  
PLW2 12.60000038 W  
PLW12 0.34999999 W  
PLW13 0.28349999 W  
SFO2 400.1316005 MHz

F2 - Processing parameters  
SI 32768  
SF 100.6127690 MHz  
WDW EX  
SSB 0  
LB 1.00 Hz  
GB 0  
PC 1.40
